# **Title:** Covid-19 Testing, Hospital Admission, and Intensive Care Among 2,026,227 United States Veterans Aged 54-75 Years

**Authors:** Christopher T. Rentsch, Ph.D.<sup>1,2</sup>, Farah Kidwai-Khan, MS<sup>1,3\*</sup>, Janet P. Tate, Sc.D.<sup>1,3\*</sup>, Lesley S. Park, Ph.D.<sup>4\*</sup>, Joseph T. King, Jr., M.D.<sup>1,5\*</sup>, Melissa Skanderson, MSW<sup>1\*</sup>, Ronald G. Hauser, M.D.<sup>1,6</sup>, Anna Schultze, Ph.D.<sup>2</sup>, Christopher I. Jarvis, Ph.D.<sup>2</sup>, Mark Holodniy, M.D.<sup>7,8</sup>, Vincent Lo Re III, M.D.<sup>9</sup>, Kathleen M. Akgün, M.D.<sup>1,3</sup>, Kristina Crothers, M.D.<sup>10</sup>, Tamar H. Taddei, M.D.<sup>1,3</sup>, Matthew S. Freiberg, M.D.<sup>11,12</sup>, and Amy C. Justice, M.D.<sup>1,3,13</sup>

1. VA Connecticut Healthcare System, US Department of Veterans Affairs, West Haven, CT, US, 06516
2. Faculty of Epidemiology and Population Health, London School of Hygiene and Tropical Medicine, London, UK, WC1E 7HT
3. Department of Internal Medicine, Yale School of Medicine, New Haven, CT, US, 06520
4. Stanford Center for Population Health Sciences, Stanford University School of Medicine, Stanford, CA, US, 94305
5. Department of Neurosurgery, Yale School of Medicine, New Haven, CT, US, 06520
6. Department of Laboratory Medicine, Yale School of Medicine, New Haven, CT, US, 06520
7. VA Palo Alto Healthcare System, US Department of Veterans Affairs, Palo Alto, CA, US, 94304
8. Division of Infectious Diseases and Geographic Medicine, Stanford University School of Medicine, Stanford, CA, US, 94305
9. Division of Infectious Diseases, Department of Medicine and Center for Clinical Epidemiology and Biostatistics, Department of Biostatistics, Epidemiology, and Informatics, Perelman School of Medicine, University of Pennsylvania, Philadelphia, PA, US, 19104
10. VA Puget Sound Health Care System and Department of Medicine, University of Washington School of Medicine, Seattle, WA, US, 98104
11. Geriatric Research Education and Clinical Center (GRECC), US Department of Veterans Affairs, Tennessee Valley Health Care System, Nashville, TN, US 37212
12. Department of Medicine, Vanderbilt University Medical Center, Nashville, TN, US, 37232
13. Center for Interdisciplinary Research on AIDS, Yale School of Public Health, New Haven, CT, US, 06511

\*These authors contributed equally

**Sources of support:** This work was supported by National Institute on Alcohol Abuse and Alcoholism [U01-AA026224, U24-AA020794, U01-AA020790, U10-AA013566].

**Conflicts of interest:** The authors declare no conflicts of interest.

**Words:** 2739

**Tables/Figures:** 4/1

## 45    **Key Points**

46    **Question:** What are the demographic and clinical characteristics associated with testing  
47    positive for coronavirus 2019 (Covid-19+), and among Covid-19+ subsequent hospitalization  
48    and intensive care among Veterans in the United States?

49    **Findings:** In this retrospective cohort study of 2,026,227 Veterans aged 54-75 years and active  
50    in care, 585/3,789 (15.4%) tested Covid-19+. Black race was strongly associated with Covid-19+,  
51    but not with hospitalization or intensive care. Among Covid-19+, laboratory abnormalities and a  
52    summary measure of physiologic injury were strongly associated with hospitalization and  
53    intensive care.

54    **Meaning:** Racial differences in testing positive for Covid-19 may be an underestimate of the  
55    general population as racial health disparities in the Veterans Affairs Healthcare System tend to  
56    be smaller than in the private sector. Risk of hospitalization and intensive care may be better  
57    characterized by laboratory measures and vital signs than by comorbid conditions or prior  
58    medication exposure.

## Abstract

**Importance:** Severe acute respiratory syndrome coronavirus 2 (SARS-CoV-2) infection causes coronavirus disease 2019 (Covid-19), an evolving pandemic. Limited data are available characterizing SARS-Cov-2 infection in the United States.

**Objective:** To determine associations between demographic and clinical factors and testing positive for coronavirus 2019 (Covid-19+), and among Covid-19+ subsequent hospitalization and intensive care.

**Design, Setting, and Participants:** Retrospective cohort study including all patients tested for Covid-19 between February 8 and March 30, 2020, inclusive. We extracted electronic health record data from the national Veterans Affairs Healthcare System, the largest integrated healthcare system in the United States, on 2,026,227 patients born between 1945 and 1965 and active in care.

**Exposures:** Demographic data, comorbidities, medication history, substance use, vital signs, and laboratory measures. Laboratory tests were analyzed first individually and then grouped into a validated summary measure of physiologic injury (VACS Index).

**Main Outcomes and Measures:** We evaluated which factors were associated with Covid-19+ among all who tested. Among Covid-19+ we identified factors associated with hospitalization or intensive care. We identified independent associations using multivariable and conditional multivariable logistic regression with multiple imputation of missing values.

**Results:** Among Veterans aged 54-75 years, 585/3,789 (15.4%) tested Covid-19+. In adjusted analysis (C-statistic=0.806) black race was associated with Covid-19+ (OR 4.68, 95% CI 3.79-5.78) and the association remained in analyses conditional on site (OR 2.56, 95% CI 1.89-3.46).

81 In adjusted models, laboratory abnormalities (especially fibrosis-4 score [FIB-4] >3.25 OR 8.73,  
 82 95% CI 4.11-18.56), and VACS Index (per 5-point increase OR 1.62, 95% CI 1.43-1.84) were  
 83 strongly associated with hospitalization. Associations were similar for intensive care. Although  
 84 significant in unadjusted analyses, associations with comorbid conditions and medications were  
 85 substantially reduced and, in most cases, no longer significant after adjustment.

86 **Conclusions and Relevance:** Black race was strongly associated with Covid-19+, but not with  
 87 hospitalization or intensive care. Among Covid-19+, risk of hospitalization and intensive care  
 88 may be better characterized by laboratory measures and vital signs than by comorbid  
 89 conditions or prior medication exposure.

## Introduction

Severe acute respiratory syndrome coronavirus 2 (SARS-CoV-2) infection causes coronavirus disease 2019 (Covid-19) and is an evolving pandemic. Limited data are available characterizing SARS-Cov-2 infection in the United States. Unadjusted analyses restricted to Covid-19 cases in China,<sup>1-5</sup> Italy,<sup>6</sup> and the United States<sup>7,8</sup> suggest that older age, diabetes, chronic obstructive lung disease (COPD), hypertension, vascular disease, renal disease, and liver disease are associated with more severe disease. Further, while some have speculated that use of angiotensin converting enzyme inhibitor (ACE), angiotensin II receptor blockers (ARB), and nonsteroidal anti-inflammatory drugs (NSAID) may exacerbate disease,<sup>9,10</sup> no analysis of this question has been published.

The Department of Veterans Affairs (VA) is the largest integrated healthcare system in the United States. All care is recorded in a national electronic health record with daily uploads into a central data repository. As a result, it is possible to extract data on patients tested for Covid-19, including outpatient and inpatient records, laboratory values, and pharmacy fill/refill data. When a well-characterized longitudinal cohort is supplemented with Covid-19 testing data, it is possible to answer important questions rapidly using validated methods.

The VA Birth Cohort includes all Veterans born between 1945 and 1965, over 2 million living individuals aged 54-75 years,<sup>11,12</sup> a demographic at particularly high risk of adverse outcomes from Covid-19.<sup>1-4</sup> Using unadjusted and adjusted analyses, we consider a wide range of factors

either associated with testing positive for Covid-19 and subsequent hospitalization and intensive care in the national VA system as of March 30, 2020.

## Methods

### *Data Source*

Using data from the VA national Corporate Data Warehouse on members of the VA Birth Cohort, we identified patients tested for Covid-19 from date of first recorded VA test on February 8, 2020 through March 30, 2020. Available data included demographics, outpatient and inpatient encounters, diagnoses, laboratory results, vital signs, health factors (e.g., smoking and alcohol health behaviors), and pharmacy dispensing records.

VA Birth Cohort was approved by the Institutional Review Boards of VA Connecticut Healthcare System and Yale University. It has been granted a waiver of informed consent and is Health Insurance Portability and Accountability Act compliant.

### *Data Collection*

We selected previously validated cohort characteristics and those that have been evaluated in prior Covid-19 reports.<sup>1,13</sup> Baseline was defined as the date of specimen collection for the Covid-19 test unless testing occurred during hospitalization, in which case it was date of admission. Demographics included age at baseline, sex, race/ethnicity, and rural/urban residence. Residence was defined using geographic information system coding based upon established criteria.<sup>14</sup>

133

## 134 *Main Study Outcomes*

135 We examined three outcomes: 1) testing positive for SARS-CoV-2 (Covid-19+), 2)  
136 hospitalization, and 3) admission to an intensive care unit (ICU). We used VA inpatient bed  
137 section codes 12 (medical) and 13 (cardiac) to identify ICU admission.

138

## 139 *Covid-19 tests*

140 We identified Covid-19 tests conducted in the VA using text searching of laboratory results  
141 containing terms consistent with SARS-CoV-2 or Covid-19. If a patient had more than one test  
142 and all were negative we selected first negative, otherwise we used date of first positive.  
143 Patients for whom results were pending (n=93) or inconclusive (n=33) were excluded. Nearly all  
144 tests utilized nasopharyngeal swabs, 1% were from other sources. Testing was performed in VA,  
145 state public health and commercial reference laboratories using emergency use authorization  
146 approved SARS-CoV-2 assays.

147

## 148 *Comorbidity*

149 We extracted diagnostic codes for asthma, cancer, COPD, chronic kidney disease, diabetes  
150 mellitus, hypertension, liver disease, vascular disease, and alcohol use disorder (definitions  
151 provided in **eTable 1**). We used a validated algorithm to capture smoking status derived from  
152 health factors.<sup>15</sup>

153

## 154 *Pharmacy Data*

We collected pharmacy fills for ACE/ARBs, chemotherapy and immunosuppressive drugs, and prescription NSAIDs and determined which medications were active in the year prior to testing. Exposure windows for NSAIDs ended 14 days prior to baseline to minimize the potential of protopathic bias. Exposure windows for other medications not used to treat Covid-19 symptoms ended three days prior to baseline.

### *Vital Signs, Clinical Laboratory Data, and a Summary Measure of Physiologic Injury*

Vital signs measured within two days of baseline included body mass index (BMI), oxygen saturation, pulse, systolic blood pressure, and temperature. We chose laboratory findings closest to baseline within a year prior or up to one week after baseline. Measures included alanine aminotransferase, albumin, aspartate aminotransferase, creatinine, estimated glomerular filtration rate,<sup>16</sup> fibrosis-4 score (FIB-4),<sup>17</sup> hemoglobin, platelet count, total white blood cell count, and lymphocyte count. We calculated a validated composite measure of physiologic injury (VACS Index) which includes age, BMI, and all previously mentioned laboratory measures save lymphocyte count<sup>18,19</sup> (details in **eMethods**).

### *Statistical Analysis*

We evaluated characteristics of patients undergoing Covid-19 testing, and among Covid-19+, factors associated with hospital admission and intensive care, using chi-square, Fisher's exact, and Wilcoxon rank-sum tests, as appropriate. For bivariate comparisons, statistical significance reflects complete case analysis. When modeling Covid-19+, we restricted analyses to factors available when initially evaluating a patient (i.e., demographic data, comorbid conditions,

medication history, health behaviors, and vital signs). Because age, black race, ACE/ARB use, and NSAID use are of special interest, we included them in all multivariable models. Otherwise, variables significant at  $p < 0.05$  in unadjusted analyses were included in the multivariable models. When modeling hospital admission and intensive care, we compared C-statistics for models including individual laboratory values to a model including VACS Index. In *post hoc* analyses we explored the association between black race and Covid-19+ with a multivariable model conditioned on site, among sites having at least five positive tests.

We report missing data for each variable. We used multiple imputation to impute missing laboratory measures, vital signs, and smoking status. The imputation model included outcomes and all covariates. Estimates from regressions performed on 10 imputed data sets were combined using Rubin's rules.<sup>20</sup> Analyses were performed using SAS version 9.4 (SAS Institute Inc., Cary, NC, USA) and Stata version 14.2 (StataCorp, LLC., College Station, TX). We used R version 3.6.3 to map Covid-19 cases in the VA system overall and those captured in the VA Birth Cohort.

## Results

In the year prior to the Covid-19 outbreak, the VA Birth Cohort included 2,026,277 living individuals: 1,866,256 (92.1%) men and 159,971 (7.9%) women. The cohort includes 1,369,454 (67.6%) white, 402,295 (19.9%) black, 106,639 (5.3%) Latinx, and 147,839 (7.3%) other or unknown race/ethnicity. More than a third of the subjects (745,284 or 36.8%) were 70-75 years of age, 23.3% (n=472,732) were 65-69 years old, 20.1% (n=407,900) were 60-64 years old, and

19.8% (n=400,311) were 54-59 years old. Of these, 3,789 individuals have been tested for Covid-19 (18.7 per 10,000 persons) since February 8, 2020 through March 30, 2020.

Testing per 10,000 persons varied by race, sex, age, and residence ( $p < 0.001$  for all). Black Veterans were more likely to be tested than white Veterans (28.0 versus 15.6). Women were more likely to be tested than men (23.3 versus 18.3). Testing generally decreased with age (age 54-59: 21.5; age 60-64: 22.2; age 65-69: 18.6; and age 70-75: 15.4). Veterans living in urban settings were more likely to be tested than those in rural settings (39.2 vs. 5.8).

Among those tested, median age was 65.7 years (**Table 1**), 90.2% were male, 29.7% were black, and 81.1% lived in urban settings. Common comorbid conditions were hypertension (65.0%), diabetes mellitus (37.8%), vascular disease (28.9%), COPD (26.2%), and alcohol use disorder (13.9%). Receipt of ACE/ARBs (40.5%) or NSAIDs (30.5%) was common. Among those tested, 42.3% were current smokers, 40.8% were obese ( $\text{BMI} > 30 \text{ kg/m}^2$ ), 7.7% were febrile ( $\geq 100.4^\circ\text{F}$ ), 13.1% were hypoxic (oxygen saturation  $\leq 93\%$ ), and 35.4% were tachycardic (pulse  $\geq 90$  beats per minute).

#### *Testing Positive vs. Negative for Covid-19*

Of the 3,789 patients tested in the VA Birth Cohort, 585 (15.4%, 95% CI 14.3-16.6) were Covid-19+, representing approximately half (585/1244, 47%) of all Covid-19+ patients in the VA as of March 30, 2020 (**Figure 1a** and **eFigure 1**). In unadjusted analyses, factors associated with Covid-19+ (**Table 1**) included male sex, black race, urban residence, chronic kidney disease,

diabetes, and hypertension (all  $p < 0.003$ ). Smoking, COPD, and alcohol use disorder were associated with a lower probability of a positive test (all  $p < 0.001$ ). No medication exposure was associated with a positive test. Vital signs associated with Covid-19+ included higher BMI, tachycardia, and higher temperature (all  $p < 0.001$ ). All laboratory values were associated with Covid-19+ (all  $p < 0.001$ ). Composite variables, eGFR and FIB-4, were also strongly associated (both  $p < 0.001$ ).

In multivariable analyses (**Table 2**, C-statistic=0.806), black race (OR 4.68, 95% CI 3.79-5.78), male sex (OR 3.17, 95% CI 2.03-4.94), urban residence (OR 1.60, 95% CI 1.17-2.20), higher temperature (OR 1.70, 95% CI 1.58-1.84 per  $1^{\circ}\text{F}$ ), lower systolic blood pressure (OR 1.44, 95% CI 1.16-1.78), and prior use of NSAIDs (OR 1.27, 95% CI 1.02-1.58) were associated with increased likelihood of Covid-19+. Current smoking (OR 0.45, 95% CI 0.35-0.57), alcohol use disorder (OR 0.58, 95% CI 0.41-0.83), and COPD (OR 0.67, 95% CI 0.50-0.88) were associated with decreased likelihood of Covid-19+. Results were similar in complete case analysis (**eTable 2**).

In *post hoc* analyses, we observed that black Veterans were more likely to be tested at sites with higher Covid-19 prevalence (**Figure 1b**). A model conditional on site (**Table 2**) reduced the association with black race (OR 2.56, 95% CI 1.89-3.46) and increased the association with male sex (OR 3.85, 95% CI 2.20-6.74). Associations with other factors were consistent with unconditional estimates.

*Risk Factors for Hospitalization and Intensive Care*

Among 585 Covid-19+ patients, 297 (50.8%, 95% CI 46.6-54.9%) were hospitalized and 122 (20.9%, 95% CI 17.6-24.4%) received intensive care. In bivariate analyses, age, chronic kidney disease, COPD, diabetes, hypertension, vascular disease, ACE/ARB exposure, and decreased oxygen saturation, and elevated temperature were associated with hospitalization and intensive care (all  $p < 0.05$ , **Table 3a and Table 3b**). All laboratory abnormalities investigated were associated with hospitalization and intensive care (all  $p < 0.05$ ). Median VACS Index scores varied substantially between those hospitalized versus not hospitalized (78.7 vs. 66.2,  $p < 0.001$ ) and between those receiving and not receiving intensive care (82.0 vs. 69.4,  $p < 0.001$ ).

Parallel models, first adjusted for all significant factors identified in bivariate analyses and then substituting VACS Index for all laboratory tests, demonstrated good discrimination for hospitalization (**Table 4**, C-statistics: 0.859, 0.834) and intensive care (C-statistics: 0.876, 0.835). White blood cell count, lymphocyte count, eGFR, albumin and FIB-4 were all independently associated with hospitalization and intensive care (**Table 4**). The most pronounced association was for patients with  $\text{FIB-4} > 3.25$  – adjusted OR 8.73 (95% CI 4.11-18.56) for hospitalization and 8.40 (95% CI 2.90-24.28) for intensive care – compared to those with  $\text{FIB-4} < 1.45$ . Of note, associations were stronger for FIB-4 and eGFR than for components of these measures (data not otherwise shown).

While COPD, diabetes, hypertension, kidney disease, vascular disease and exposure to ACE/ARB exposure were associated with hospitalization and intensive care in unadjusted analyses, they

were not significantly associated after adjusting for laboratory abnormalities and vital signs (Table 4). Results were similar in complete case analysis (eTable 3).

## Discussion

Our analysis represents over 2 million veterans, aged 54-75 years, receiving care in the largest integrated healthcare system in the United States. The study was conducted within an established cohort and based on well annotated national electronic health record data, enabling a rapid and reliable analysis of Covid-19 testing and initial outcomes. As a result, we were able to validate and extend previous findings, to include a careful consideration of who is Covid-19+ and, given a positive test, what factors were independently associated with hospitalization and intensive care. We found that black Veterans were twice as likely to be tested and 2.5 times as likely to test positive than non-black Veterans, even after adjusting for urban residence and conditioning on geographic location. While we saw modest evidence of an association between exposure to NSAIDs and risk of Covid-19+, vital signs and laboratory measures better characterized risk of hospitalization and intensive care than did comorbid diagnoses or prior medication exposures.

In unadjusted analyses, black Veterans were over four times as likely to test positive compared to non-black Veterans; adjusting for urban versus rural residence did not change this association. While black Veterans were much more likely to be tested at high prevalence facilities, conditioning our analysis by site did not eliminate the association; black race retained over a two-fold increased risk for testing Covid-19+. Of note, black Veterans were also more

likely to be tested, which could dilute the proportion positive. Further, black Veterans did not experience higher rates of hospitalization or intensive care. Based on prior experience with 1918 Spanish Flu and 2009 H1N1 epidemic, public health experts have warned that minority populations may be at higher risk of infection due to reduced capacity to implement physical distancing.<sup>21,22</sup> Our findings may be an underestimate of the US population as racial health disparities in VA tend to be smaller than in the private sector.<sup>23</sup>

Women were more likely to be tested for Covid-19 than men, and men were twice as likely to test positive. This association strengthened after adjustment and in conditional analyses (**Table 2**) but should be considered preliminary given limited numbers of women in this analysis.

As reported previously<sup>24</sup> elevated temperature was independently associated with testing positive, hospital admission and intensive care, underscoring the value of including fever in the current testing algorithms. Findings from the multivariable regression suggest that other factors might also be used to indicate a test, including black race, male sex, and lack of an alternative explanation for cough symptoms. To wit, we found that current smoking, COPD, and alcohol use disorder, factors that generally increase risk of pneumonia, were associated with decreased probability of testing positive. While they were not associated with hospitalization or intensive care, it is too early to tell if these factors are associated with subsequent outcomes such as respiratory failure or mortality.

Presence of particular comorbid diagnoses may be less prognostic than overall acute on chronic injury reflected in laboratory abnormalities largely encompassed in the VACS Index. In unadjusted analyses, several comorbid conditions were associated with hospitalization and intensive care but were not independently associated after adjusting for vital signs and laboratory data. Further, while elevated white blood cell counts and decreased lymphocyte counts were associated with hospitalization and intensive care, the pronounced independent association with FIB-4 (a composite of platelets and transaminases) and albumin suggest that virally induced hepatic inflammation may be a harbinger of the cytokine storm.<sup>25-27</sup>

VACS Index, which includes FIB-4, albumin, and white blood cell count, is predictive of mortality in many clinical settings.<sup>18</sup> A five-point difference in score corresponds to a 30% difference in mortality. The 12.5-point difference in medians between the Veterans who were and were not admitted, and the 12.6-point difference between those who received and did not receive intensive care underscores the wide range of prognoses seen with Covid-19. Future work will need to determine whether VACS Index might be used in medical triage of Covid-19+ patients.

Our analysis is one of the first to address concerns regarding exposure to NSAIDs and ACE/ARBs and Covid-19.<sup>9,10</sup> We found NSAID exposure was modestly associated with Covid-19+ in unadjusted and adjusted analyses, but not with hospitalization or intensive care. Among those testing positive, ACE/ARB exposure was associated with hospitalization and intensive care in unadjusted analyses, but associations lost statistical significance with hospitalization and diminished with intensive care after adjusting for clinical measures, including hypertension and

blood pressure. However, confidence intervals were wide, include clinically important differences, and conclusions may change as the epidemic evolves. We will continue to update these analyses as more data become available.

While this analysis adds information to the evolving pandemic, its limitations must be kept in mind. First, a small proportion of Veterans have been tested and rates of testing vary widely by site. Second, women represented a small number of Veterans in the sample (184 tested, 13 positive). Third, our analysis of outcomes is preliminary as many Covid-19+ patients are still in care. Fourth, while a strength of this analysis is our ability to determine active VA medications, we could only detect NSAID exposure based upon VA pharmacy fill/refill data, individuals are also likely to purchase NSAIDS over the counter. As real-world data become available, more sophisticated and focused pharmacoepidemiological analyses will be required to address concerns regarding potential risk of medications associated with Covid-19.

## Conclusion

Black race was strongly associated with Covid-19+, but not with hospitalization or intensive care. Unadjusted associations between medication exposure, comorbid disease, and hospitalization and intensive care are diminished after adjustment. Risk of hospitalization and intensive care associated with Covid-19 may be better characterized by vital signs and measures of physiologic injury than by comorbid conditions or medication history.

## 349    **Acknowledgements**

350    The views and opinions expressed in this manuscript are those of the authors and do not  
 351    necessarily represent those of the Department of Veterans Affairs or the United States  
 352    Government. The authors wish to recognize Dr. Kendall Bryant as the NIAAA Scientific  
 353    Collaborator for the Veterans Birth Cohort. The authors thank Dr. Jennifer Thompson for her  
 354    feedback regarding helpful data presentation and important characteristics to include to enable  
 355    statistical modeling of the Covid-19 pandemic.

## References

1. Guan WJ, Ni ZY, Hu Y, et al. Clinical Characteristics of Coronavirus Disease 2019 in China. *The New England journal of medicine*. 2020.
2. Weiss P, Murdoch DR. Clinical course and mortality risk of severe COVID-19. *Lancet*. 2020.
3. Yang J, Zheng Y, Gou X, et al. Prevalence of comorbidities in the novel Wuhan coronavirus (COVID-19) infection: a systematic review and meta-analysis. *Int J Infect Dis*. 2020.
4. Zhou F, Yu T, Du R, et al. Clinical course and risk factors for mortality of adult inpatients with COVID-19 in Wuhan, China: a retrospective cohort study. *Lancet*. 2020.
5. Wu Z, McGoogan JM. Characteristics of and Important Lessons From the Coronavirus Disease 2019 (COVID-19) Outbreak in China: Summary of a Report of 72314 Cases From the Chinese Center for Disease Control and Prevention. *JAMA*. 2020.
6. Grasselli G, Zangrillo A, Zanella A, et al. Baseline Characteristics and Outcomes of 1591 Patients Infected With SARS-CoV-2 Admitted to ICUs of the Lombardy Region, Italy. *JAMA*. 2020.
7. Preliminary Estimates of the Prevalence of Selected Underlying Health Conditions Among Patients with Coronavirus Disease 2019 — United States, February 12–March 28, 2020. *MMWR Morb Mortal Wkly Rep*. doi:<http://dx.doi.org/10.15585/mmwr.mm6913e2>. Published 31 March 2020. Accessed 31 March 2020.

- 377 8. Bhatraju PK, Ghassemieh BJ, Nichols M, et al. Covid-19 in Critically Ill Patients in the  
378 Seattle Region - Case Series. *The New England journal of medicine*. 2020.
- 379 9. Day M. Covid-19: ibuprofen should not be used for managing symptoms, say doctors  
380 and scientists. *BMJ*. 2020;368:m1086.
- 381 10. Fang L, Karakiulakis G, Roth M. Are patients with hypertension and diabetes mellitus at  
382 increased risk for COVID-19 infection? *Lancet Respir Med*. 2020.
- 383 11. Njei B, Esserman D, Krishnan S, et al. Regional and Rural-Urban Differences in the Use of  
384 Direct-acting Antiviral Agents for Hepatitis C Virus: The Veteran Birth Cohort. *Med Care*.  
385 2019;57(4):279-285.
- 386 12. Sarkar S, Esserman DA, Skanderson M, Levin FL, Justice AC, Lim JK. Disparities in  
387 hepatitis C testing in U.S. veterans born 1945-1965. *J Hepatol*. 2016;65(2):259-265.
- 388 13. Zhou F, Yu T, Du R, et al. Clinical course and risk factors for mortality of adult inpatients  
389 with COVID-19 in Wuhan, China: a retrospective cohort study. *Lancet*.  
390 2020;395(10229):1054-1062.
- 391 14. Abrams TE, Vaughan-Sarrazin M, Kaboli PJ. Mortality and revascularization following  
392 admission for acute myocardial infarction: implication for rural veterans. *J Rural Health*.  
393 2010;26(4):310-317.
- 394 15. McGinnis KA, Brandt CA, Skanderson M, et al. Validating smoking data from the  
395 Veteran's Affairs Health Factors dataset, an electronic data source. *Nicotine Tob Res*.  
396 2011;13(12):1233-1239.
- 397 16. Levey AS, Stevens LA, Schmid CH, et al. A new equation to estimate glomerular filtration  
398 rate. *Ann Intern Med*. 2009;150(9):604-612.

17. Sterling RK, Lissen E, Clumeck N, et al. Development of a simple noninvasive index to predict significant fibrosis in patients with HIV/HCV coinfection. *Hepatology*. 2006;43(6):1317-1325.
18. Justice AC, Tate JP. Strengths and Limitations of the Veterans Aging Cohort Study Index as a Measure of Physiologic Frailty. *AIDS Res Hum Retroviruses*. 2019;35(11-12):1023-1033.
19. Tate JP, Sterne JAC, Justice AC, Veterans Aging Cohort S, the Antiretroviral Therapy Cohort C. Albumin, white blood cell count, and body mass index improve discrimination of mortality in HIV-positive individuals. *AIDS*. 2019;33(5):903-912.
20. Rubin DB. *Multiple Imputation for nonresponse in surveys*. Vol 81: John Wiley & Sons; 2004.
21. Centers for Disease Control and Prevention. Flu-Related Hospitalizations and Deaths in the United States from April 2009 – January 30, 2010. [https://www.cdc.gov/H1N1flu/hosp\\_deaths\\_aheadra.htm](https://www.cdc.gov/H1N1flu/hosp_deaths_aheadra.htm). Published 2010. Accessed April 2, 2020.
22. Hutchins SS, Fiscella K, Levine RS, Ompad DC, McDonald M. Protection of racial/ethnic minority populations during an influenza pandemic. *Am J Public Health*. 2009;99 Suppl 2:S261-270.
23. Peterson K, Anderson J, Boundy E, Ferguson L, McCleery E, Waldrip K. Mortality Disparities in Racial/Ethnic Minority Groups in the Veterans Health Administration: An Evidence Review and Map. *Am J Public Health*. 2018;108(3):e1-e11.

420 24. Sohrabi C, Alsafi Z, O'Neill N, et al. World Health Organization declares global  
421 emergency: A review of the 2019 novel coronavirus (COVID-19). *Int J Surg*. 2020;76:71-  
422 76.

423 25. Heymann F, Tacke F. Immunology in the liver--from homeostasis to disease. *Nat Rev*  
424 *Gastroenterol Hepatol*. 2016;13(2):88-110.

425 26. Racanelli V, Rehermann B. The liver as an immunological organ. *Hepatology*. 2006;43(2  
426 Suppl 1):S54-62.

427 27. Ramadori G, Armbrust T. Cytokines in the liver. *Eur J Gastroenterol Hepatol*.  
428 2001;13(7):777-784.

429  
430

## 431    **Figure legends**

432    **Figure 1.** Distribution of Covid-19 cases in the Veterans Birth Cohort as of March 30, 2020

433    **Caption:** (a) Shown is the distribution of 585/1244 (47%) Covid-19 cases in the Veterans Health  
 434    Administration captured in the Veterans Birth Cohort as of March 30, 2020 and included in the  
 435    current study. (b) Shown is the proportion of Covid-19 test results that are positive by the  
 436    proportion of Covid-19 cases of black race by site of care.

437

**Table 1.** Characteristics of patients tested for Covid-19 among all patients aged 54-75 years in the Veterans Health Administration as of March 30, 2020

|                                                                                | Covid-19 test result |         |         |                  |         |                  |         |                      |
|--------------------------------------------------------------------------------|----------------------|---------|---------|------------------|---------|------------------|---------|----------------------|
|                                                                                | No. tested           | (%)     | missing | Positive         | (%)     | Negative         | (%)     | p-value <sup>a</sup> |
| Sample size, n                                                                 | 3789                 | (100.0) |         | 585              | (100.0) | 3204             | (100.0) | 15.4 (14.3-16.6)     |
| <b>Demographics</b>                                                            |                      |         |         |                  |         |                  |         |                      |
| Age, years                                                                     |                      |         |         |                  |         |                  |         |                      |
| Median (IQR)                                                                   | 65.7 (60.5-70.7)     |         | 0       | 66.1 (60.4-71.0) |         | 65.6 (60.5-70.7) |         | 0.24                 |
| 54-59                                                                          | 861 (22.7)           |         |         | 135 (23.1)       |         | 726 (22.7)       |         | 0.21                 |
| 60-64                                                                          | 906 (23.9)           |         |         | 135 (23.1)       |         | 771 (24.1)       |         |                      |
| 65-69                                                                          | 877 (23.1)           |         |         | 120 (20.5)       |         | 757 (23.6)       |         |                      |
| 70-75                                                                          | 1145 (30.2)          |         |         | 195 (33.3)       |         | 950 (29.7)       |         |                      |
| Sex                                                                            |                      |         |         |                  |         |                  |         |                      |
| Female                                                                         | 372 (9.8)            |         | 0       | 27 (4.6)         |         | 345 (10.8)       |         | <0.001               |
| Male                                                                           | 3417 (90.2)          |         |         | 558 (95.4)       |         | 2859 (89.2)      |         |                      |
| Race/ethnicity                                                                 |                      |         |         |                  |         |                  |         |                      |
| White                                                                          | 2135 (56.3)          |         | 0       | 161 (27.5)       |         | 1974 (61.6)      |         | <0.001               |
| Black                                                                          | 1126 (29.7)          |         |         | 350 (59.8)       |         | 776 (24.2)       |         |                      |
| Latinx                                                                         | 294 (7.8)            |         |         | 48 (8.2)         |         | 246 (7.7)        |         |                      |
| Other/unknown                                                                  | 234 (6.2)            |         |         | 26 (4.4)         |         | 208 (6.5)        |         |                      |
| Residence type                                                                 |                      |         |         |                  |         |                  |         |                      |
| Rural                                                                          | 718 (18.9)           |         | 0       | 56 (9.6)         |         | 662 (20.7)       |         | <0.001               |
| Urban                                                                          | 3071 (81.1)          |         |         | 529 (90.4)       |         | 2542 (79.3)      |         |                      |
| <b>Baseline comorbidity</b>                                                    |                      |         |         |                  |         |                  |         |                      |
| Asthma                                                                         |                      |         |         |                  |         |                  |         |                      |
| No                                                                             | 3506 (92.5)          |         | 0       | 540 (92.3)       |         | 2966 (92.6)      |         | 0.80                 |
| Yes                                                                            | 283 (7.5)            |         |         | 45 (7.7)         |         | 238 (7.4)        |         |                      |
| Cancer                                                                         |                      |         |         |                  |         |                  |         |                      |
| No                                                                             | 3218 (84.9)          |         | 0       | 502 (85.8)       |         | 2716 (84.8)      |         | 0.57                 |
| Yes                                                                            | 571 (15.1)           |         |         | 83 (14.2)        |         | 488 (15.2)       |         |                      |
| Chronic kidney disease                                                         |                      |         |         |                  |         |                  |         |                      |
| No                                                                             | 3228 (85.2)          |         | 0       | 474 (81.0)       |         | 2754 (86.0)      |         | 0.003                |
| Yes                                                                            | 561 (14.8)           |         |         | 111 (19.0)       |         | 450 (14.0)       |         |                      |
| Chronic obstructive pulmonary disease                                          |                      |         |         |                  |         |                  |         |                      |
| No                                                                             | 2796 (73.8)          |         | 0       | 495 (84.6)       |         | 2301 (71.8)      |         | <0.001               |
| Yes                                                                            | 993 (26.2)           |         |         | 90 (15.4)        |         | 903 (28.2)       |         |                      |
| Diabetes mellitus                                                              |                      |         |         |                  |         |                  |         |                      |
| No                                                                             | 2358 (62.2)          |         | 0       | 325 (55.6)       |         | 2033 (63.5)      |         | <0.001               |
| Yes                                                                            | 1431 (37.8)          |         |         | 260 (44.4)       |         | 1171 (36.5)      |         |                      |
| Hypertension                                                                   |                      |         |         |                  |         |                  |         |                      |
| No                                                                             | 1326 (35.0)          |         | 0       | 162 (27.7)       |         | 1164 (36.3)      |         | <0.001               |
| Yes                                                                            | 2463 (65.0)          |         |         | 423 (72.3)       |         | 2040 (63.7)      |         |                      |
| Liver disease                                                                  |                      |         |         |                  |         |                  |         |                      |
| No                                                                             | 3323 (87.7)          |         | 0       | 525 (89.7)       |         | 2798 (87.3)      |         | 0.12                 |
| Yes                                                                            | 466 (12.3)           |         |         | 60 (10.3)        |         | 406 (12.7)       |         |                      |
| Vascular disease                                                               |                      |         |         |                  |         |                  |         |                      |
| No                                                                             | 2694 (71.1)          |         | 0       | 422 (72.1)       |         | 2272 (70.9)      |         | 0.59                 |
| Yes                                                                            | 1095 (28.9)          |         |         | 163 (27.9)       |         | 932 (29.1)       |         |                      |
| <b>Substance use</b>                                                           |                      |         |         |                  |         |                  |         |                      |
| Alcohol use disorder                                                           |                      |         |         |                  |         |                  |         |                      |
| No                                                                             | 3261 (86.1)          |         | 0       | 537 (91.8)       |         | 2724 (85.0)      |         | <0.001               |
| Yes                                                                            | 528 (13.9)           |         |         | 48 (8.2)         |         | 480 (15.0)       |         |                      |
| Smoking                                                                        |                      |         |         |                  |         |                  |         |                      |
| Never                                                                          | 1042 (27.5)          |         | 261     | 216 (36.9)       |         | 826 (25.8)       |         | <0.001               |
| Former                                                                         | 883 (23.3)           |         |         | 179 (30.6)       |         | 704 (22.0)       |         |                      |
| Current                                                                        | 1603 (42.3)          |         |         | 159 (27.2)       |         | 1444 (45.1)      |         |                      |
| <b>Medication history in year prior to test date</b>                           |                      |         |         |                  |         |                  |         |                      |
| Any angiotensin converting enzyme inhibitor or angiotensin II receptor blocker |                      |         |         |                  |         |                  |         |                      |
| No                                                                             | 2257 (59.6)          |         | 0       | 330 (56.4)       |         | 1927 (60.1)      |         | 0.10                 |
| Yes                                                                            | 1532 (40.4)          |         |         | 255 (43.6)       |         | 1277 (39.9)      |         |                      |
| Angiotensin converting enzyme inhibitor                                        |                      |         |         |                  |         |                  |         |                      |
| No                                                                             | 2778 (73.3)          |         | 0       | 416 (71.1)       |         | 2362 (73.7)      |         | 0.20                 |
| Yes                                                                            | 1011 (26.7)          |         |         | 169 (28.9)       |         | 842 (26.3)       |         |                      |
| Angiotensin II receptor blocker                                                |                      |         |         |                  |         |                  |         |                      |
| No                                                                             | 3226 (85.1)          |         | 0       | 491 (83.9)       |         | 2735 (85.4)      |         | 0.38                 |
| Yes                                                                            | 563 (14.9)           |         |         | 94 (16.1)        |         | 469 (14.6)       |         |                      |
| Chemotherapy or immunosuppressive drug                                         |                      |         |         |                  |         |                  |         |                      |
| No                                                                             | 3568 (94.2)          |         | 0       | 556 (95.0)       |         | 3012 (94.0)      |         | 0.39                 |
| Yes                                                                            | 221 (5.8)            |         |         | 29 (5.0)         |         | 192 (6.0)        |         |                      |
| Nonsteroidal anti-inflammatory drug, (-365, -14 days)                          |                      |         |         |                  |         |                  |         |                      |
| No                                                                             | 2634 (69.5)          |         | 0       | 392 (67.0)       |         | 2242 (70.0)      |         | 0.16                 |
| Yes                                                                            | 1155 (30.5)          |         |         | 193 (33.0)       |         | 962 (30.0)       |         |                      |
| <b>Vital signs at test date</b>                                                |                      |         |         |                  |         |                  |         |                      |
| Body mass index, kg/m <sup>2</sup>                                             |                      |         |         |                  |         |                  |         |                      |
| <25.0                                                                          | 779 (20.6)           |         | 393     | 73 (12.5)        |         | 706 (22.0)       |         | <0.001               |
| 25.0-29.9                                                                      | 1070 (28.2)          |         |         | 166 (28.4)       |         | 904 (28.2)       |         |                      |
| ≥30                                                                            | 1547 (40.8)          |         |         | 291 (49.7)       |         | 1256 (39.2)      |         |                      |
| Hypoxia [oxygen saturation ≤93%]                                               |                      |         |         |                  |         |                  |         |                      |

|                                          |      |             |     |      |             |      |             |        |                  |
|------------------------------------------|------|-------------|-----|------|-------------|------|-------------|--------|------------------|
| No                                       | 2433 | (64.2)      | 860 | 443  | (75.7)      | 1990 | (62.1)      | 0.20   | 18.2 (16.7-19.8) |
| Yes                                      | 496  | (13.1)      |     | 78   | (13.3)      | 418  | (13.0)      |        | 15.7 (12.6-19.2) |
| Pulse ≥90 beats per minute               |      |             |     |      |             |      |             |        |                  |
| No                                       | 2033 | (53.7)      | 416 | 295  | (50.4)      | 1738 | (54.2)      | <0.001 | 14.5 (13.0-16.1) |
| Yes                                      | 1340 | (35.4)      |     | 257  | (43.9)      | 1083 | (33.8)      |        | 19.2 (17.1-21.4) |
| Systolic blood pressure, mm Hg           |      |             |     |      |             |      |             |        |                  |
| <90                                      | 355  | (9.4)       | 448 | 63   | (10.8)      | 292  | (9.1)       | 0.11   | 17.8 (13.9-22.1) |
| 90-140                                   | 1565 | (41.3)      |     | 274  | (46.8)      | 1291 | (40.3)      |        | 17.5 (15.7-19.5) |
| ≥140                                     | 1421 | (37.5)      |     | 211  | (36.1)      | 1210 | (37.8)      |        | 14.9 (13.0-16.8) |
| Temperature, °F                          |      |             |     |      |             |      |             |        |                  |
| ≤98.6                                    | 2142 | (56.5)      | 405 | 204  | (34.9)      | 1938 | (60.5)      | <0.001 | 9.5 (8.3-10.9)   |
| 98.7-100.3                               | 953  | (25.2)      |     | 227  | (38.8)      | 726  | (22.7)      |        | 23.8 (21.2-26.7) |
| ≥100.4                                   | 289  | (7.6)       |     | 120  | (20.5)      | 169  | (5.3)       |        | 41.5 (35.8-47.4) |
| <b>La boratory findings at test date</b> |      |             |     |      |             |      |             |        |                  |
| Alanine aminotransferase, U/L            |      |             |     |      |             |      |             |        |                  |
| Median (IQR)                             | 23.0 | (16.0-34.0) | 400 | 28.0 | (19.0-41.0) | 22.0 | (16.0-33.0) | <0.001 |                  |
| ≤40                                      | 2829 | (74.7)      |     | 406  | (69.4)      | 2423 | (75.6)      | <0.001 | 14.4 (13.1-15.7) |
| >40                                      | 560  | (14.8)      |     | 138  | (23.6)      | 422  | (13.2)      |        | 24.6 (21.1-28.4) |
| Albumin, g/dL                            |      |             |     |      |             |      |             |        |                  |
| Median (IQR)                             | 3.9  | (3.5-4.2)   | 383 | 3.8  | (3.5-4.2)   | 3.9  | (3.5-4.2)   | 0.78   |                  |
| ≥3.5                                     | 2596 | (68.5)      |     | 415  | (70.9)      | 2181 | (68.1)      | 1.00   | 16.0 (14.6-17.5) |
| <3.5                                     | 810  | (21.4)      |     | 129  | (22.1)      | 681  | (21.3)      |        | 15.9 (13.5-18.6) |
| Aspartate aminotransferase, U/L          |      |             |     |      |             |      |             |        |                  |
| Median (IQR)                             | 23.0 | (18.0-32.0) | 356 | 29.0 | (21.5-43.0) | 22.0 | (17.0-30.0) | <0.001 |                  |
| ≤40                                      | 2902 | (76.6)      |     | 391  | (66.8)      | 2511 | (78.4)      | <0.001 | 13.5 (12.3-14.8) |
| >40                                      | 531  | (14.0)      |     | 157  | (26.8)      | 374  | (11.7)      |        | 29.6 (25.7-33.7) |
| Creatinine, mg/dL                        |      |             |     |      |             |      |             |        |                  |
| Median (IQR)                             | 1.1  | (0.9-1.3)   | 186 | 1.1  | (1.0-1.5)   | 1.0  | (0.9-1.3)   | <0.001 |                  |
| ≤1.5                                     | 3033 | (80.0)      |     | 435  | (74.4)      | 2598 | (81.1)      | <0.001 | 14.3 (13.1-15.6) |
| >1.5                                     | 570  | (15.0)      |     | 130  | (22.2)      | 440  | (13.7)      |        | 22.8 (19.4-26.5) |
| eGFR, mL/min                             |      |             |     |      |             |      |             |        |                  |
| Median (IQR)                             | 75.0 | (59.0-91.0) | 168 | 71.5 | (53.0-87.0) | 76.0 | (60.0-92.0) | <0.001 |                  |
| ≥15                                      | 3492 | (92.2)      |     | 541  | (92.5)      | 2951 | (92.1)      | 0.11   | 15.5 (14.3-16.7) |
| <15                                      | 129  | (3.4)       |     | 27   | (4.6)       | 102  | (3.2)       |        | 20.9 (14.3-29.0) |
| FIB-4                                    |      |             |     |      |             |      |             |        |                  |
| <1.45                                    | 1499 | (39.6)      | 628 | 139  | (23.8)      | 1360 | (42.4)      | <0.001 | 9.3 (7.9-10.9)   |
| 1.45-3.25                                | 1266 | (33.4)      |     | 263  | (45.0)      | 1003 | (31.3)      |        | 20.8 (18.6-23.1) |
| >3.25                                    | 396  | (10.5)      |     | 114  | (19.5)      | 282  | (8.8)       |        | 28.8 (24.4-33.5) |
| Hemoglobin, g/dL                         |      |             |     |      |             |      |             |        |                  |
| Median (IQR)                             | 13.8 | (12.2-15.0) | 445 | 13.9 | (12.6-14.9) | 13.8 | (12.2-15.0) | 0.09   |                  |
| ≥10                                      | 3097 | (81.7)      |     | 523  | (89.4)      | 2574 | (80.3)      | <0.001 | 16.9 (15.6-18.3) |
| <10                                      | 247  | (6.5)       |     | 17   | (2.9)       | 230  | (7.2)       |        | 6.9 (4.1-10.8)   |
| Platelet count, K/μL                     |      |             |     |      |             |      |             |        |                  |
| Median (IQR)                             | 218  | (173-267)   | 423 | 193  | (154-230)   | 223  | (178-275)   | <0.001 |                  |
| ≥150                                     | 2875 | (75.9)      |     | 416  | (71.1)      | 2459 | (76.7)      | <0.001 | 14.5 (13.2-15.8) |
| <150                                     | 491  | (13.0)      |     | 121  | (20.7)      | 370  | (11.5)      |        | 24.6 (20.9-28.7) |
| White blood cell count, K/μL             |      |             |     |      |             |      |             |        |                  |
| Median (IQR)                             | 7.5  | (5.7-10.0)  | 288 | 5.9  | (4.7-7.5)   | 7.8  | (6.0-10.4)  | <0.001 |                  |
| <4                                       | 191  | (5.0)       |     | 72   | (12.3)      | 119  | (3.7)       | <0.001 | 37.7 (30.8-45.0) |
| 4-9.9                                    | 2448 | (64.6)      |     | 432  | (73.8)      | 2016 | (62.9)      |        | 17.7 (16.2-19.2) |
| ≥10                                      | 862  | (22.8)      |     | 49   | (8.4)       | 813  | (25.4)      |        | 5.7 (4.2-7.5)    |
| Lymphocyte count, K/μL                   |      |             |     |      |             |      |             |        |                  |
| Median (IQR)                             | 1.4  | (1.0-2.0)   | 628 | 1.1  | (0.8-1.6)   | 1.5  | (1.0-2.1)   | <0.001 |                  |
| ≥0.8                                     | 2626 | (69.3)      |     | 363  | (62.1)      | 2263 | (70.6)      | <0.001 | 13.8 (12.5-15.2) |
| <0.8                                     | 535  | (14.1)      |     | 130  | (22.2)      | 405  | (12.6)      |        | 24.3 (20.7-28.2) |
| <b>Clinical outcomes</b>                 |      |             |     |      |             |      |             |        |                  |
| Hospitalized                             |      |             |     |      |             |      |             |        |                  |
| No                                       | 2277 | (60.1)      | 0   | 288  | (49.2)      | 1989 | (62.1)      | <0.001 | 12.7 (11.3-14.1) |
| Yes                                      | 1512 | (39.9)      |     | 297  | (50.8)      | 1215 | (37.9)      |        | 19.6 (17.7-21.7) |
| Intensive care unit admission            |      |             |     |      |             |      |             |        |                  |
| No                                       | 3381 | (89.2)      | 0   | 463  | (79.1)      | 2918 | (91.1)      | <0.001 | 13.7 (12.6-14.9) |
| Yes                                      | 408  | (10.8)      |     | 122  | (20.9)      | 286  | (8.9)       |        | 29.9 (25.5-34.6) |
| Death during hospitalization             |      |             |     |      |             |      |             |        |                  |
| No                                       | 3744 | (98.8)      | 0   | 568  | (97.1)      | 3176 | (99.1)      | <0.001 | 15.2 (14.0-16.4) |
| Yes                                      | 45   | (1.2)       |     | 17   | (2.9)       | 28   | (0.9)       |        | 37.8 (23.8-53.5) |

Abbreviations: Covid-19, coronavirus disease 2019; IQR, interquartile range; eGFR, estimated glomerular filtration rate; FIB-4, fibrosis 4 score

\*P-values calculated on non-missing data

438

439

440

441

**Table 2.** Crude and adjusted associations with testing positive for Covid-19 as of March 30, 2020

|                                                                                        | Positive Covid-19 test (n=585/3789) |                              |                                         |
|----------------------------------------------------------------------------------------|-------------------------------------|------------------------------|-----------------------------------------|
|                                                                                        | Univariable OR<br>(95% CI)          | Multivariable OR<br>(95% CI) | Conditional<br>OR <sup>a</sup> (95% CI) |
| <b>Model details</b>                                                                   |                                     |                              |                                         |
| C-statistic                                                                            | -                                   | 0.806                        | n/a                                     |
| <b>Demographics</b>                                                                    |                                     |                              |                                         |
| Age, per 5-year increase                                                               | 1.04 (0.97-1.12)                    | 1.05 (0.96-1.15)             | 1.02 (0.91-1.15)                        |
| Sex, male vs. female                                                                   | 2.49 (1.67-3.73)                    | 3.17 (2.03-4.94)             | 3.85 (2.20-6.74)                        |
| Race/ethnicity, black vs. other                                                        | 4.66 (3.88-5.60)                    | 4.68 (3.79-5.78)             | 2.56 (1.89-3.46)                        |
| Residence type, urban vs. rural                                                        | 2.46 (1.84-3.28)                    | 1.60 (1.17-2.20)             | 1.04 (0.64-1.68)                        |
| <b>Baseline comorbidity</b>                                                            |                                     |                              |                                         |
| Chronic kidney disease, yes vs. no                                                     | 1.43 (1.14-1.80)                    | 1.00 (0.76-1.33)             | 0.92 (0.64-1.31)                        |
| Chronic obstructive pulmonary disease, yes vs. no                                      | 0.46 (0.37-0.59)                    | 0.67 (0.50-0.88)             | 0.77 (0.54-1.09)                        |
| Diabetes mellitus, yes vs. no                                                          | 1.39 (1.16-1.66)                    | 1.01 (0.80-1.26)             | 0.89 (0.67-1.19)                        |
| Hypertension, yes vs. no                                                               | 1.49 (1.23-1.81)                    | 1.23 (0.95-1.60)             | 1.40 (1.00-1.96)                        |
| <b>Substance use</b>                                                                   |                                     |                              |                                         |
| Alcohol use disorder, yes vs. no                                                       | 0.51 (0.37-0.69)                    | 0.58 (0.41-0.83)             | 0.52 (0.34-0.82)                        |
| Current smoking, yes vs. no                                                            | 0.43 (0.35-0.52)                    | 0.45 (0.35-0.57)             | 0.45 (0.34-0.61)                        |
| <b>Medication history in year prior to test date</b>                                   |                                     |                              |                                         |
| Angiotensin converting enzyme inhibitor or angiotensin II receptor blocker, yes vs. no | 1.17 (0.98-1.39)                    | 0.98 (0.78-1.23)             | 0.93 (0.69-1.24)                        |
| Nonsteroidal anti-inflammatory drug, yes vs. no                                        | 1.15 (0.95-1.39)                    | 1.27 (1.02-1.58)             | 1.16 (0.87-1.54)                        |
| <b>Vital signs</b>                                                                     |                                     |                              |                                         |
| Systolic blood pressure, <140 vs. ≥140 mm Hg                                           | 1.25 (1.03-1.51)                    | 1.44 (1.16-1.78)             | 1.29 (0.99-1.69)                        |
| Body mass index, per 5 kg/m <sup>2</sup> increase                                      | 1.15 (1.08-1.23)                    | 1.09 (1.00-1.18)             | 1.10 (0.99-1.22)                        |
| Oxygen saturation, ≤93% vs >93%                                                        | 0.88 (0.68-1.15)                    | 1.04 (0.76-1.42)             | 1.04 (0.67-1.61)                        |
| Pulse, per 5-beats per minute increase                                                 | 0.99 (0.99-1.00)                    | 0.99 (0.99-1.00)             | 1.00 (0.99-1.00)                        |
| Temperature, per 1°F increase                                                          | 1.74 (1.62-1.87)                    | 1.70 (1.58-1.84)             | 1.69 (1.53-1.88)                        |

Abbreviations: Covid-19, coronavirus disease 2019; OR, odds ratio; CI, confidence interval

<sup>a</sup>Modeling stations with five or more Covid-19 cases and conditioning on station

442

443

444

445

**Table 3a.** Associations with hospitalization among Covid-19 cases aged 54-75 years in the Veterans Health Administration as of March 30, 2020

|                                                                                | No. cases        | (%)   | missing | Hospitalization  |         |                  | % hospitalized (95% CI) |
|--------------------------------------------------------------------------------|------------------|-------|---------|------------------|---------|------------------|-------------------------|
|                                                                                |                  |       |         | Yes              | (%)     | No               |                         |
| n                                                                              | 585              | (100) |         | 297              | (100.0) | 288              | (100.0)                 |
| <b>Demographics</b>                                                            |                  |       |         |                  |         |                  |                         |
| Age, years                                                                     |                  |       |         |                  |         |                  |                         |
| Median (IQR)                                                                   | 66.1 (60.4-71.0) |       | 0       | 67.6 (61.7-71.6) |         | 64.5 (59.7-70.5) | 0.001                   |
| 54-59                                                                          | 135 (23.1)       |       |         | 58 (19.5)        |         | 77 (26.7)        | 0.02                    |
| 60-64                                                                          | 135 (23.1)       |       |         | 62 (20.9)        |         | 73 (25.3)        |                         |
| 65-69                                                                          | 120 (20.5)       |       |         | 62 (20.9)        |         | 58 (20.1)        |                         |
| 70-75                                                                          | 195 (33.3)       |       |         | 115 (38.7)       |         | 80 (27.8)        |                         |
| Sex                                                                            |                  |       |         |                  |         |                  |                         |
| Female                                                                         | 27 (4.6)         |       | 0       | 8 (2.7)          |         | 19 (6.6)         | 0.03                    |
| Male                                                                           | 558 (95.4)       |       |         | 289 (97.3)       |         | 269 (93.4)       |                         |
| Race/ethnicity                                                                 |                  |       |         |                  |         |                  |                         |
| White                                                                          | 161 (27.5)       |       | 0       | 79 (26.6)        |         | 82 (28.5)        | 0.32                    |
| Black                                                                          | 350 (59.8)       |       |         | 187 (63.0)       |         | 163 (56.6)       |                         |
| Latinx                                                                         | 48 (8.2)         |       |         | 20 (6.7)         |         | 28 (9.7)         |                         |
| Other/unknown                                                                  | 26 (4.4)         |       |         | 11 (3.7)         |         | 15 (5.2)         |                         |
| Residence type                                                                 |                  |       |         |                  |         |                  |                         |
| Rural                                                                          | 56 (9.6)         |       | 0       | 27 (9.1)         |         | 29 (10.1)        | 0.78                    |
| Urban                                                                          | 529 (90.4)       |       |         | 270 (90.9)       |         | 259 (89.9)       |                         |
| <b>Baseline comorbidity</b>                                                    |                  |       |         |                  |         |                  |                         |
| Asthma                                                                         |                  |       |         |                  |         |                  |                         |
| No                                                                             | 540 (92.3)       |       | 0       | 273 (91.9)       |         | 267 (92.7)       | 0.76                    |
| Yes                                                                            | 45 (7.7)         |       |         | 24 (8.1)         |         | 21 (7.3)         |                         |
| Cancer                                                                         |                  |       |         |                  |         |                  |                         |
| No                                                                             | 502 (85.8)       |       | 0       | 252 (84.8)       |         | 250 (86.8)       | 0.55                    |
| Yes                                                                            | 83 (14.2)        |       |         | 45 (15.2)        |         | 38 (13.2)        |                         |
| Chronic kidney disease                                                         |                  |       |         |                  |         |                  |                         |
| No                                                                             | 474 (81.0)       |       | 0       | 222 (74.7)       |         | 252 (87.5)       | <0.001                  |
| Yes                                                                            | 111 (19.0)       |       |         | 75 (25.3)        |         | 36 (12.5)        |                         |
| Chronic obstructive pulmonary disease                                          |                  |       |         |                  |         |                  |                         |
| No                                                                             | 495 (84.6)       |       | 0       | 236 (79.5)       |         | 259 (89.9)       | <0.001                  |
| Yes                                                                            | 90 (15.4)        |       |         | 61 (20.5)        |         | 29 (10.1)        |                         |
| Diabetes mellitus                                                              |                  |       |         |                  |         |                  |                         |
| No                                                                             | 325 (55.6)       |       | 0       | 141 (47.5)       |         | 184 (63.9)       | <0.001                  |
| Yes                                                                            | 260 (44.4)       |       |         | 156 (52.5)       |         | 104 (36.1)       |                         |
| Hypertension                                                                   |                  |       |         |                  |         |                  |                         |
| No                                                                             | 162 (27.7)       |       | 0       | 59 (19.9)        |         | 103 (35.8)       | <0.001                  |
| Yes                                                                            | 423 (72.3)       |       |         | 238 (80.1)       |         | 185 (64.2)       |                         |
| Liver disease                                                                  |                  |       |         |                  |         |                  |                         |
| No                                                                             | 525 (89.7)       |       | 0       | 260 (87.5)       |         | 265 (92.0)       | 0.08                    |
| Yes                                                                            | 60 (10.3)        |       |         | 37 (12.5)        |         | 23 (8.0)         |                         |
| Vascular disease                                                               |                  |       |         |                  |         |                  |                         |
| No                                                                             | 422 (72.1)       |       | 0       | 184 (62.0)       |         | 238 (82.6)       | <0.001                  |
| Yes                                                                            | 163 (27.9)       |       |         | 113 (38.0)       |         | 50 (17.4)        |                         |
| <b>Substance use</b>                                                           |                  |       |         |                  |         |                  |                         |
| Alcohol use disorder                                                           |                  |       |         |                  |         |                  |                         |
| No                                                                             | 537 (91.8)       |       | 0       | 269 (90.6)       |         | 268 (93.1)       | 0.29                    |
| Yes                                                                            | 48 (8.2)         |       |         | 28 (9.4)         |         | 20 (6.9)         |                         |
| Smoking                                                                        |                  |       |         |                  |         |                  |                         |
| Never                                                                          | 216 (36.9)       |       | 31      | 106 (35.7)       |         | 110 (38.2)       | 0.30                    |
| Former                                                                         | 179 (30.6)       |       |         | 89 (30.0)        |         | 90 (31.3)        |                         |
| Current                                                                        | 159 (27.2)       |       |         | 90 (30.3)        |         | 69 (24.0)        |                         |
| <b>Medication history in year prior to test date</b>                           |                  |       |         |                  |         |                  |                         |
| Any angiotensin converting enzyme inhibitor or angiotensin II receptor blocker |                  |       |         |                  |         |                  |                         |
| No                                                                             | 330 (56.4)       |       | 0       | 150 (50.5)       |         | 180 (62.5)       | 0.004                   |
| Yes                                                                            | 255 (43.6)       |       |         | 147 (49.5)       |         | 108 (37.5)       |                         |
| Angiotensin converting enzyme inhibitor                                        |                  |       |         |                  |         |                  |                         |
| No                                                                             | 416 (71.1)       |       | 0       | 194 (65.3)       |         | 222 (77.1)       | 0.002                   |
| Yes                                                                            | 169 (28.9)       |       |         | 103 (34.7)       |         | 66 (22.9)        |                         |
| Angiotensin II receptor blocker                                                |                  |       |         |                  |         |                  |                         |
| No                                                                             | 491 (83.9)       |       | 0       | 248 (83.5)       |         | 243 (84.4)       | 0.82                    |
| Yes                                                                            | 94 (16.1)        |       |         | 49 (16.5)        |         | 45 (15.6)        |                         |
| Chemotherapy or immunosuppressive drug                                         |                  |       |         |                  |         |                  |                         |
| No                                                                             | 556 (95.0)       |       | 0       | 279 (93.9)       |         | 277 (96.2)       | 0.25                    |
| Yes                                                                            | 29 (5.0)         |       |         | 18 (6.1)         |         | 11 (3.8)         |                         |
| Nonsteroidal anti-inflammatory drug, (-365, -14 days)                          |                  |       |         |                  |         |                  |                         |
| No                                                                             | 392 (67.0)       |       | 0       | 207 (69.7)       |         | 185 (64.2)       | 0.19                    |
| Yes                                                                            | 193 (33.0)       |       |         | 90 (30.3)        |         | 103 (35.8)       |                         |
| <b>Vital signs at test date</b>                                                |                  |       |         |                  |         |                  |                         |
| Body mass index, kg/m <sup>2</sup>                                             |                  |       |         |                  |         |                  |                         |
| <25.0                                                                          | 73 (12.5)        |       | 55      | 45 (15.2)        |         | 28 (9.7)         | 0.25                    |
| 25.0-29.9                                                                      | 166 (28.4)       |       |         | 85 (28.6)        |         | 81 (28.1)        |                         |
| ≥30                                                                            | 291 (49.7)       |       |         | 149 (50.2)       |         | 142 (49.3)       |                         |
| Hypoxia (oxygen saturation ≤93%)                                               |                  |       |         |                  |         |                  |                         |
| No                                                                             | 443 (75.7)       |       | 64      | 226 (76.1)       |         | 217 (75.3)       | <0.001                  |

|                                              |      |             |    |      |             |      |             |        |      |             |
|----------------------------------------------|------|-------------|----|------|-------------|------|-------------|--------|------|-------------|
| Yes                                          | 78   | (13.3)      |    | 58   | (19.5)      | 20   | (6.9)       |        | 74.4 | (63.2-83.6) |
| Pulse ≥90 beats per minute                   |      |             |    |      |             |      |             |        |      |             |
| No                                           | 295  | (50.4)      | 33 | 150  | (50.5)      | 145  | (50.3)      | 0.20   | 50.9 | (45.0-56.7) |
| Yes                                          | 257  | (43.9)      |    | 145  | (48.8)      | 112  | (38.9)      |        | 56.4 | (50.1-62.6) |
| Systolic blood pressure, mm Hg               |      |             |    |      |             |      |             |        |      |             |
| <90                                          | 63   | (10.8)      | 37 | 43   | (14.5)      | 20   | (6.9)       | 0.04   | 68.3 | (55.3-79.4) |
| 90-140                                       | 274  | (46.8)      |    | 145  | (48.8)      | 129  | (44.8)      |        | 52.9 | (46.8-59.0) |
| ≥140                                         | 211  | (36.1)      |    | 106  | (35.7)      | 105  | (36.5)      |        | 50.2 | (43.3-57.2) |
| Temperature, °F                              |      |             |    |      |             |      |             |        |      |             |
| ≤98.6                                        | 204  | (34.9)      | 34 | 88   | (29.6)      | 116  | (40.3)      | 0.002  | 43.1 | (36.2-50.2) |
| 98.7-100.3                                   | 227  | (38.8)      |    | 134  | (45.1)      | 93   | (32.3)      |        | 59.0 | (52.3-65.5) |
| ≥100.4                                       | 120  | (20.5)      |    | 70   | (23.6)      | 50   | (17.4)      |        | 58.3 | (49.0-67.3) |
| <b>Laboratory findings at test date</b>      |      |             |    |      |             |      |             |        |      |             |
| Alanine aminotransferase, U/L                |      |             |    |      |             |      |             |        |      |             |
| Median (IQR)                                 | 28.0 | (19.0-41.0) | 41 | 30.0 | (20.0-42.0) | 26.0 | (18.0-37.0) | 0.01   |      |             |
| ≤40                                          | 406  | (69.4)      |    | 205  | (69.0)      | 201  | (69.8)      | 0.01   | 50.5 | (45.5-55.5) |
| >40                                          | 138  | (23.6)      |    | 87   | (29.3)      | 51   | (17.7)      |        | 63.0 | (54.4-71.1) |
| Albumin, g/dL                                |      |             |    |      |             |      |             |        |      |             |
| Median (IQR)                                 | 3.8  | (3.5-4.2)   | 41 | 3.7  | (3.3-4.0)   | 4.1  | (3.7-4.3)   | <0.001 |      |             |
| ≥3.5                                         | 415  | (70.9)      |    | 191  | (64.3)      | 224  | (77.8)      | <0.001 | 46.0 | (41.2-51.0) |
| <3.5                                         | 129  | (22.1)      |    | 103  | (34.7)      | 26   | (9.0)       |        | 79.8 | (71.9-86.4) |
| Aspartate aminotransferase, U/L              |      |             |    |      |             |      |             |        |      |             |
| Median (IQR)                                 | 29.0 | (21.5-43.0) | 37 | 35.5 | (25.0-54.0) | 25.0 | (20.0-33.0) | <0.001 |      |             |
| ≤40                                          | 391  | (66.8)      |    | 173  | (58.2)      | 218  | (75.7)      | <0.001 | 44.3 | (39.3-49.3) |
| >40                                          | 157  | (26.8)      |    | 121  | (40.7)      | 36   | (12.5)      |        | 77.1 | (69.7-83.4) |
| Creatinine, mg/dL                            |      |             |    |      |             |      |             |        |      |             |
| Median (IQR)                                 | 1.1  | (1.0-1.5)   | 20 | 1.3  | (1.0-1.8)   | 1.1  | (0.9-1.3)   | <0.001 |      |             |
| ≤1.5                                         | 435  | (74.4)      |    | 200  | (67.3)      | 235  | (81.6)      | <0.001 | 46.0 | (41.2-50.8) |
| >1.5                                         | 130  | (22.2)      |    | 97   | (32.7)      | 33   | (11.5)      |        | 74.6 | (66.2-81.8) |
| eGFR, mL/min                                 |      |             |    |      |             |      |             |        |      |             |
| Median (IQR)                                 | 71.5 | (53.0-87.0) | 17 | 63.0 | (42.0-82.0) | 75.0 | (64.0-93.0) | <0.001 |      |             |
| ≥15                                          | 541  | (92.5)      |    | 277  | (93.3)      | 264  | (91.7)      | 0.03   | 51.2 | (46.9-55.5) |
| <15                                          | 27   | (4.6)       |    | 20   | (6.7)       | 7    | (2.4)       |        | 74.1 | (53.7-88.9) |
| FIB-4                                        |      |             |    |      |             |      |             |        |      |             |
| <1.45                                        | 139  | (23.8)      | 69 | 36   | (12.1)      | 103  | (35.8)      | <0.001 | 25.9 | (18.9-34.0) |
| 1.45-3.25                                    | 263  | (45.0)      |    | 153  | (51.5)      | 110  | (38.2)      |        | 58.2 | (52.0-64.2) |
| >3.25                                        | 114  | (19.5)      |    | 94   | (31.6)      | 20   | (6.9)       |        | 82.5 | (74.2-88.9) |
| Hemoglobin, g/dL                             |      |             |    |      |             |      |             |        |      |             |
| Median (IQR)                                 | 13.9 | (12.6-14.9) | 45 | 13.6 | (12.0-14.7) | 14.2 | (13.2-15.1) | <0.001 |      |             |
| ≥10                                          | 523  | (89.4)      |    | 273  | (91.9)      | 250  | (86.8)      | 0.02   | 52.2 | (47.8-56.6) |
| <10                                          | 17   | (2.9)       |    | 14   | (4.7)       | 3    | (1.0)       |        | 82.4 | (56.6-96.2) |
| Platelet count, K/μL                         |      |             |    |      |             |      |             |        |      |             |
| Median (IQR)                                 | 193  | (154-230)   | 48 | 175  | (143-216)   | 208  | (173-252)   | <0.001 |      |             |
| ≥150                                         | 416  | (71.1)      |    | 200  | (67.3)      | 216  | (75.0)      | <0.001 | 48.1 | (43.2-53.0) |
| <150                                         | 121  | (20.7)      |    | 88   | (29.6)      | 33   | (11.5)      |        | 72.7 | (63.9-80.4) |
| White blood cell count, K/μL                 |      |             |    |      |             |      |             |        |      |             |
| Median (IQR)                                 | 5.9  | (4.7-7.5)   | 32 | 5.9  | (4.6-7.7)   | 5.9  | (4.7-7.3)   | 0.54   |      |             |
| <4                                           | 72   | (12.3)      |    | 42   | (14.1)      | 30   | (10.4)      | 0.005  | 58.3 | (46.1-69.9) |
| 4-9.9                                        | 432  | (73.8)      |    | 217  | (73.1)      | 215  | (74.7)      |        | 50.2 | (45.4-55.1) |
| ≥10                                          | 49   | (8.4)       |    | 36   | (12.1)      | 13   | (4.5)       |        | 73.5 | (58.9-85.1) |
| Lymphocyte count, K/μL                       |      |             |    |      |             |      |             |        |      |             |
| Median (IQR)                                 | 1.1  | (0.8-1.6)   | 92 | 0.9  | (0.6-1.3)   | 1.4  | (1.0-1.9)   | <0.001 |      |             |
| ≥0.8                                         | 363  | (62.1)      |    | 179  | (60.3)      | 184  | (63.9)      | <0.001 | 49.3 | (44.1-54.6) |
| <0.8                                         | 130  | (22.2)      |    | 105  | (35.4)      | 25   | (8.7)       |        | 80.8 | (72.9-87.2) |
| VACS Index score <sup>b</sup> , median (IQR) | 72.4 | (63.6-82.5) | 51 | 78.7 | (71.1-87.3) | 66.2 | (60.0-73.2) | <0.001 |      |             |

Abbreviations: Covid-19, coronavirus disease 2019; IQR, interquartile range; eGFR, estimated glomerular filtration rate; FIB-4, fibrosis 4 score; VACS, Veterans Aging Cohort Study

<sup>a</sup>P-values calculated on non-missing data

<sup>b</sup>The VACS Index score is a validated measure of physiologic injury and combining age, aspartate and alanine transaminase, albumin, creatinine, hemoglobin, platelets, white blood cell count, hepatitis C status, and body mass index

446

447

448

449

450

451

**Table 3b.** Associations with intensive care among Covid-19 cases aged 54-75 years in the Veterans Health Administration as of March 30, 2020

|                                                                                | No. cases        | (%)   | missing | Intensive care   |         |                  | % admitted (95% CI) |
|--------------------------------------------------------------------------------|------------------|-------|---------|------------------|---------|------------------|---------------------|
|                                                                                |                  |       |         | Yes              | (%)     | No               |                     |
| n                                                                              | 585              | (100) |         | 122              | (100.0) | 463              | (100.0)             |
| <b>Demographics</b>                                                            |                  |       |         |                  |         |                  |                     |
| Age, years                                                                     |                  |       |         |                  |         |                  |                     |
| Median (IQR)                                                                   | 66.1 (60.4-71.0) |       | 0       | 69.9 (64.4-71.7) |         | 64.7 (59.8-70.8) | <0.001              |
| 54-59                                                                          | 135 (23.1)       |       |         | 11 (9.0)         |         | 124 (26.8)       | <0.001              |
| 60-64                                                                          | 135 (23.1)       |       |         | 24 (19.7)        |         | 111 (24.0)       |                     |
| 65-69                                                                          | 120 (20.5)       |       |         | 28 (23.0)        |         | 92 (19.9)        |                     |
| 70-75                                                                          | 195 (33.3)       |       |         | 59 (48.4)        |         | 136 (29.4)       |                     |
| Sex                                                                            |                  |       |         |                  |         |                  |                     |
| Female                                                                         | 27 (4.6)         |       | 0       | 3 (2.5)          |         | 24 (5.2)         | 0.33                |
| Male                                                                           | 558 (95.4)       |       |         | 119 (97.5)       |         | 439 (94.8)       |                     |
| Race/ethnicity                                                                 |                  |       |         |                  |         |                  |                     |
| White                                                                          | 161 (27.5)       |       | 0       | 37 (30.3)        |         | 124 (26.8)       | 0.89                |
| Black                                                                          | 350 (59.8)       |       |         | 71 (58.2)        |         | 279 (60.3)       |                     |
| Latinx                                                                         | 48 (8.2)         |       |         | 9 (7.4)          |         | 39 (8.4)         |                     |
| Other/unknown                                                                  | 26 (4.4)         |       |         | 5 (4.1)          |         | 21 (4.5)         |                     |
| Residence type                                                                 |                  |       |         |                  |         |                  |                     |
| Rural                                                                          | 56 (9.6)         |       | 0       | 9 (7.4)          |         | 47 (10.2)        | 0.49                |
| Urban                                                                          | 529 (90.4)       |       |         | 113 (92.6)       |         | 416 (89.8)       |                     |
| <b>Baseline comorbidity</b>                                                    |                  |       |         |                  |         |                  |                     |
| Asthma                                                                         |                  |       |         |                  |         |                  |                     |
| No                                                                             | 540 (92.3)       |       | 0       | 111 (91.0)       |         | 429 (92.7)       | 0.57                |
| Yes                                                                            | 45 (7.7)         |       |         | 11 (9.0)         |         | 34 (7.3)         |                     |
| Cancer                                                                         |                  |       |         |                  |         |                  |                     |
| No                                                                             | 502 (85.8)       |       | 0       | 104 (85.2)       |         | 398 (86.0)       | 0.88                |
| Yes                                                                            | 83 (14.2)        |       |         | 18 (14.8)        |         | 65 (14.0)        |                     |
| Chronic kidney disease                                                         |                  |       |         |                  |         |                  |                     |
| No                                                                             | 474 (81.0)       |       | 0       | 90 (73.8)        |         | 384 (82.9)       | 0.03                |
| Yes                                                                            | 111 (19.0)       |       |         | 32 (26.2)        |         | 79 (17.1)        |                     |
| Chronic obstructive pulmonary disease                                          |                  |       |         |                  |         |                  |                     |
| No                                                                             | 495 (84.6)       |       | 0       | 94 (77.0)        |         | 401 (86.6)       | 0.02                |
| Yes                                                                            | 90 (15.4)        |       |         | 28 (23.0)        |         | 62 (13.4)        |                     |
| Diabetes mellitus                                                              |                  |       |         |                  |         |                  |                     |
| No                                                                             | 325 (55.6)       |       | 0       | 49 (40.2)        |         | 276 (59.6)       | <0.001              |
| Yes                                                                            | 260 (44.4)       |       |         | 73 (59.8)        |         | 187 (40.4)       |                     |
| Hypertension                                                                   |                  |       |         |                  |         |                  |                     |
| No                                                                             | 162 (27.7)       |       | 0       | 17 (13.9)        |         | 145 (31.3)       | <0.001              |
| Yes                                                                            | 423 (72.3)       |       |         | 105 (86.1)       |         | 318 (68.7)       |                     |
| Liver disease                                                                  |                  |       |         |                  |         |                  |                     |
| No                                                                             | 525 (89.7)       |       | 0       | 107 (87.7)       |         | 418 (90.3)       | 0.40                |
| Yes                                                                            | 60 (10.3)        |       |         | 15 (12.3)        |         | 45 (9.7)         |                     |
| Vascular disease                                                               |                  |       |         |                  |         |                  |                     |
| No                                                                             | 422 (72.1)       |       | 0       | 74 (60.7)        |         | 348 (75.2)       | 0.002               |
| Yes                                                                            | 163 (27.9)       |       |         | 48 (39.3)        |         | 115 (24.8)       |                     |
| <b>Substance use</b>                                                           |                  |       |         |                  |         |                  |                     |
| Alcohol use disorder                                                           |                  |       |         |                  |         |                  |                     |
| No                                                                             | 537 (91.8)       |       | 0       | 115 (94.3)       |         | 422 (91.1)       | 0.35                |
| Yes                                                                            | 48 (8.2)         |       |         | 7 (5.7)          |         | 41 (8.9)         |                     |
| Smoking                                                                        |                  |       |         |                  |         |                  |                     |
| Never                                                                          | 216 (36.9)       |       | 31      | 43 (35.2)        |         | 173 (37.4)       | 0.60                |
| Former                                                                         | 179 (30.6)       |       |         | 36 (29.5)        |         | 143 (30.9)       |                     |
| Current                                                                        | 159 (27.2)       |       |         | 38 (23.9)        |         | 121 (26.1)       |                     |
| <b>Medication history in year prior to test date</b>                           |                  |       |         |                  |         |                  |                     |
| Any angiotensin converting enzyme inhibitor or angiotensin II receptor blocker |                  |       |         |                  |         |                  |                     |
| No                                                                             | 330 (56.4)       |       | 0       | 53 (43.4)        |         | 277 (59.8)       | 0.001               |
| Yes                                                                            | 255 (43.6)       |       |         | 69 (56.6)        |         | 186 (40.2)       |                     |
| Angiotensin converting enzyme inhibitor                                        |                  |       |         |                  |         |                  |                     |
| No                                                                             | 416 (71.1)       |       | 0       | 72 (59.0)        |         | 344 (74.3)       | 0.002               |
| Yes                                                                            | 169 (28.9)       |       |         | 50 (41.0)        |         | 119 (25.7)       |                     |
| Angiotensin II receptor blocker                                                |                  |       |         |                  |         |                  |                     |
| No                                                                             | 491 (83.9)       |       | 0       | 99 (81.1)        |         | 392 (84.7)       | 0.34                |
| Yes                                                                            | 94 (16.1)        |       |         | 23 (18.9)        |         | 71 (15.3)        |                     |
| Chemotherapy or immunosuppressive drug                                         |                  |       |         |                  |         |                  |                     |
| No                                                                             | 556 (95.0)       |       | 0       | 115 (94.3)       |         | 441 (95.2)       | 0.64                |
| Yes                                                                            | 29 (5.0)         |       |         | 7 (5.7)          |         | 22 (4.8)         |                     |
| Nonsteroidal anti-inflammatory drug, (-365, -14 days)                          |                  |       |         |                  |         |                  |                     |
| No                                                                             | 392 (67.0)       |       | 0       | 90 (73.8)        |         | 302 (65.2)       | 0.08                |
| Yes                                                                            | 193 (33.0)       |       |         | 32 (26.2)        |         | 161 (34.8)       |                     |
| <b>Vital signs at test date</b>                                                |                  |       |         |                  |         |                  |                     |
| Body mass index, kg/m <sup>2</sup>                                             |                  |       |         |                  |         |                  |                     |
| <25.0                                                                          | 73 (12.5)        |       | 55      | 19 (15.6)        |         | 54 (11.7)        | 0.18                |
| 25.0-29.9                                                                      | 166 (28.4)       |       |         | 28 (23.0)        |         | 138 (29.8)       |                     |
| ≥30                                                                            | 291 (49.7)       |       |         | 67 (23.0)        |         | 224 (48.4)       |                     |
| Hypoxia (oxygen saturation ≤93%)                                               |                  |       |         |                  |         |                  |                     |
| No                                                                             | 443 (75.7)       |       | 64      | 87 (71.3)        |         | 356 (76.9)       | <0.001              |

|                                              |      |             |    |      |             |      |             |        |                  |
|----------------------------------------------|------|-------------|----|------|-------------|------|-------------|--------|------------------|
| Yes                                          | 78   | (13.3)      |    | 30   | (24.6)      | 48   | (10.4)      |        | 38.5 (27.7-50.2) |
| Pulse ≥90 beats per minute                   |      |             |    |      |             |      |             |        |                  |
| No                                           | 295  | (50.4)      | 33 | 53   | (43.4)      | 242  | (52.3)      | 0.02   | 18.0 (13.8-22.8) |
| Yes                                          | 257  | (43.9)      |    | 68   | (55.7)      | 189  | (40.8)      |        | 26.5 (21.2-32.3) |
| Systolic blood pressure, mm Hg               |      |             |    |      |             |      |             |        |                  |
| <90                                          | 63   | (10.8)      | 37 | 17   | (13.9)      | 46   | (9.9)       | 0.57   | 27.0 (16.6-39.7) |
| 90-140                                       | 274  | (46.8)      |    | 60   | (49.2)      | 214  | (46.2)      |        | 21.9 (17.2-27.3) |
| ≥140                                         | 211  | (36.1)      |    | 44   | (36.1)      | 167  | (36.1)      |        | 20.9 (15.6-27.0) |
| Temperature, °F                              |      |             |    |      |             |      |             |        |                  |
| ≤98.6                                        | 204  | (34.9)      | 34 | 28   | (23.0)      | 176  | (38.0)      | 0.002  | 13.7 (9.3-19.2)  |
| 98.7-100.3                                   | 227  | (38.8)      |    | 56   | (45.9)      | 171  | (36.9)      |        | 24.7 (19.2-30.8) |
| ≥100.4                                       | 120  | (20.5)      |    | 34   | (27.9)      | 86   | (18.6)      |        | 28.3 (20.5-37.3) |
| <b>Laboratory findings at test date</b>      |      |             |    |      |             |      |             |        |                  |
| Alanine aminotransferase, U/L                |      |             |    |      |             |      |             |        |                  |
| Median (IQR)                                 | 28.0 | (19.0-41.0) | 41 | 32.0 | (21.0-47.0) | 27.0 | (19.0-38.0) | 0.02   |                  |
| ≤40                                          | 406  | (69.4)      |    | 78   | (63.9)      | 328  | (70.8)      | 0.004  | 19.2 (15.5-23.4) |
| >40                                          | 138  | (23.6)      |    | 43   | (35.2)      | 95   | (20.5)      |        | 31.2 (23.6-39.6) |
| Albumin, g/dL                                |      |             |    |      |             |      |             |        |                  |
| Median (IQR)                                 | 3.8  | (3.5-4.2)   | 41 | 3.6  | (3.2-3.9)   | 3.9  | (3.6-4.2)   | <0.001 |                  |
| ≥3.5                                         | 415  | (70.9)      |    | 68   | (55.7)      | 347  | (74.9)      | <0.001 | 16.4 (13.0-20.3) |
| <3.5                                         | 129  | (22.1)      |    | 54   | (44.3)      | 75   | (16.2)      |        | 41.9 (33.2-50.9) |
| Aspartate aminotransferase, U/L              |      |             |    |      |             |      |             |        |                  |
| Median (IQR)                                 | 29.0 | (21.5-43.0) | 37 | 42.0 | (27.0-68.0) | 27.0 | (21.0-39.0) | <0.001 |                  |
| ≤40                                          | 391  | (66.8)      |    | 59   | (48.4)      | 332  | (71.7)      | <0.001 | 15.1 (11.7-19.0) |
| >40                                          | 157  | (26.8)      |    | 63   | (51.6)      | 94   | (20.3)      |        | 40.1 (32.4-48.2) |
| Creatinine, mg/dL                            |      |             |    |      |             |      |             |        |                  |
| Median (IQR)                                 | 1.1  | (1.0-1.5)   | 20 | 1.4  | (1.1-2.0)   | 1.1  | (0.9-1.4)   | <0.001 |                  |
| ≤1.5                                         | 435  | (74.4)      |    | 72   | (59.0)      | 363  | (78.4)      | <0.001 | 16.6 (13.2-20.4) |
| >1.5                                         | 130  | (22.2)      |    | 50   | (41.0)      | 80   | (17.3)      |        | 38.5 (30.1-47.4) |
| eGFR, mL/min                                 |      |             |    |      |             |      |             |        |                  |
| Median (IQR)                                 | 71.5 | (53.0-87.0) | 17 | 55.5 | (37.0-76.0) | 74.0 | (58.0-90.0) | <0.001 |                  |
| ≥15                                          | 541  | (92.5)      |    | 110  | (90.2)      | 431  | (93.1)      | 0.006  | 20.3 (17.0-24.0) |
| <15                                          | 27   | (4.6)       |    | 12   | (9.8)       | 15   | (3.2)       |        | 44.4 (25.5-64.7) |
| FIB-4                                        |      |             |    |      |             |      |             |        |                  |
| <1.45                                        | 139  | (23.8)      | 69 | 6    | (4.9)       | 133  | (28.7)      | <0.001 | 4.3 (1.6-9.2)    |
| 1.45-3.25                                    | 263  | (45.0)      |    | 66   | (54.1)      | 197  | (42.5)      |        | 25.1 (20.0-30.8) |
| >3.25                                        | 114  | (19.5)      |    | 44   | (36.1)      | 70   | (15.1)      |        | 38.6 (29.6-48.2) |
| Hemoglobin, g/dL                             |      |             |    |      |             |      |             |        |                  |
| Median (IQR)                                 | 13.9 | (12.6-14.9) | 45 | 13.6 | (11.9-14.7) | 14.0 | (12.8-15.0) | 0.02   |                  |
| ≥10                                          | 523  | (89.4)      |    | 109  | (89.3)      | 414  | (89.4)      | 0.02   | 20.8 (17.4-24.6) |
| <10                                          | 17   | (2.9)       |    | 8    | (6.6)       | 9    | (1.9)       |        | 47.1 (23.0-72.2) |
| Platelet count, K/μL                         |      |             |    |      |             |      |             |        |                  |
| Median (IQR)                                 | 193  | (154-230)   | 48 | 175  | (144-228)   | 195  | (157-231)   | 0.05   |                  |
| ≥150                                         | 416  | (71.1)      |    | 82   | (19.7)      | 334  | (72.1)      | 0.03   | 19.7 (16.0-23.9) |
| <150                                         | 121  | (20.7)      |    | 35   | (28.9)      | 86   | (18.6)      |        | 28.9 (21.1-37.9) |
| White blood cell count, K/μL                 |      |             |    |      |             |      |             |        |                  |
| Median (IQR)                                 | 5.9  | (4.7-7.5)   | 32 | 6.2  | (5.2-8.9)   | 5.7  | (4.6-7.2)   | <0.001 |                  |
| <4                                           | 72   | (12.3)      |    | 12   | (16.7)      | 60   | (13.0)      | 0.002  | 16.7 (8.9-27.3)  |
| 4-9.9                                        | 432  | (73.8)      |    | 89   | (20.6)      | 343  | (74.1)      |        | 20.6 (16.9-24.7) |
| ≥10                                          | 49   | (8.4)       |    | 21   | (42.9)      | 28   | (6.0)       |        | 42.9 (28.8-57.8) |
| Lymphocyte count, K/μL                       |      |             |    |      |             |      |             |        |                  |
| Median (IQR)                                 | 1.1  | (0.8-1.6)   | 92 | 0.8  | (0.6-1.1)   | 1.2  | (0.8-1.8)   | <0.001 |                  |
| ≥0.8                                         | 363  | (62.1)      |    | 71   | (19.6)      | 292  | (63.1)      | <0.001 | 19.6 (15.6-24.0) |
| <0.8                                         | 130  | (22.2)      |    | 48   | (36.9)      | 82   | (17.7)      |        | 36.9 (28.6-45.8) |
| VACS Index score <sup>b</sup> , median (IQR) | 72.4 | (63.6-82.5) | 51 | 82.0 | (74.0-91.1) | 69.4 | (61.1-79.1) | <0.001 |                  |

Abbreviations: Covid-19, coronavirus disease 2019; IQR, interquartile range; eGFR, estimated glomerular filtration rate; FIB-4, fibrosis 4 score; VACS, Veterans Aging Cohort Study

<sup>a</sup>P-values calculated on non-missing data

<sup>b</sup>The VACS Index score is a validated measure of physiologic injury and combining age, aspartate and alanine transaminase, albumin, creatinine, hemoglobin, platelets, white blood cell count, hepatitis C status, and body mass index

452

453

454

455

456

457

**Table 4.** Crude and adjusted associations with hospitalization and intensive care among Covid-19 cases as of March 30, 2020

|                                                                                           | Hospitalization (n=297/585) |                              |                              | Intensive care (n=122/585) |                              |                              |
|-------------------------------------------------------------------------------------------|-----------------------------|------------------------------|------------------------------|----------------------------|------------------------------|------------------------------|
|                                                                                           | Univariable OR<br>(95% CI)  | Multivariable<br>OR (95% CI) | Multivariable OR<br>(95% CI) | Univariable OR<br>(95% CI) | Multivariable<br>OR (95% CI) | Multivariable OR<br>(95% CI) |
| <b>Model details</b>                                                                      |                             |                              |                              |                            |                              |                              |
| C-statistic                                                                               | -                           | 0.859                        | 0.834                        | -                          | 0.876                        | 0.835                        |
| <b>Demographics</b>                                                                       |                             |                              |                              |                            |                              |                              |
| Age, per 5-year increase                                                                  | 1.26 (1.10-1.44)            | 0.87 (0.71-1.05)             | 0.64 (0.51-0.80)             | 1.55 (1.30-1.86)           | 1.31 (1.03-1.66)             | 0.98 (0.76-1.26)             |
| Race/ethnicity, black vs. other                                                           | 1.30 (0.94-1.82)            | 0.96 (0.61-1.53)             | 1.14 (0.74-1.74)             | 0.92 (0.61-1.38)           | 0.94 (0.55-1.63)             | 0.98 (0.60-1.61)             |
| <b>Baseline comorbidity</b>                                                               |                             |                              |                              |                            |                              |                              |
| Chronic kidney disease, yes vs. no                                                        | 2.36 (1.53-3.66)            | 0.80 (0.41-1.56)             | 0.84 (0.47-1.49)             | 1.73 (1.08-2.77)           | 0.50 (0.24-1.06)             | 0.65 (0.35-1.21)             |
| Chronic obstructive pulmonary disease, yes vs. no                                         | 2.31 (1.43-3.72)            | 1.77 (0.92-3.41)             | 1.15 (0.62-2.12)             | 1.93 (1.17-3.18)           | 1.81 (0.92-3.58)             | 1.47 (0.79-2.73)             |
| Diabetes mellitus, yes vs. no                                                             | 1.96 (1.41-2.73)            | 1.59 (1.00-2.53)             | 1.36 (0.89-2.09)             | 2.20 (1.46-3.30)           | 1.69 (0.96-2.98)             | 1.41 (0.85-2.35)             |
| Hypertension, yes vs. no                                                                  | 2.25 (1.55-3.26)            | 1.39 (0.78-2.46)             | 1.50 (0.88-2.54)             | 2.81 (1.63-4.88)           | 1.51 (0.70-3.28)             | 1.89 (0.93-3.87)             |
| Vascular disease, yes vs. no                                                              | 2.92 (1.99-4.29)            | 1.58 (0.93-2.69)             | 1.58 (0.96-2.60)             | 1.96 (1.29-2.99)           | 0.73 (0.40-1.33)             | 0.77 (0.44-1.34)             |
| <b>Medication history in year prior to test date</b>                                      |                             |                              |                              |                            |                              |                              |
| Angiotensin converting enzyme inhibitor or<br>angiotensin II receptor blocker, yes vs. no | 1.63 (1.17-2.27)            | 1.15 (0.71-1.87)             | 1.24 (0.79-1.95)             | 1.94 (1.30-2.90)           | 1.66 (0.94-2.93)             | 1.69 (1.01-2.84)             |
| Nonsteroidal anti-inflammatory drug, yes vs. no                                           | 0.78 (0.55-1.10)            | 1.18 (0.74-1.89)             | 1.09 (0.71-1.67)             | 0.67 (0.43-1.04)           | 1.16 (0.65-2.06)             | 0.98 (0.57-1.67)             |
| <b>Vital signs</b>                                                                        |                             |                              |                              |                            |                              |                              |
| Systolic blood pressure, per 5 mm Hg decrease                                             | 1.10 (1.03-1.17)            | 1.08 (1.00-1.18)             | 1.09 (1.00-1.17)             | 1.05 (0.98-1.13)           | 1.00 (0.92-1.10)             | 1.00 (0.91-1.09)             |
| Oxygen saturation, per 1% decrease                                                        | 1.14 (1.06-1.23)            | 1.04 (0.95-1.14)             | 1.12 (1.02-1.22)             | 1.16 (1.09-1.24)           | 1.05 (0.97-1.14)             | 1.13 (1.05-1.21)             |
| Pulse, per 5-beats per minute increase                                                    | 0.97 (0.95-0.99)            | 0.97 (0.95-0.99)             | 0.97 (0.95-0.99)             | 0.99 (0.97-1.00)           | 1.00 (0.97-1.02)             | 0.99 (0.97-1.01)             |
| Temperature, per 1°F increase                                                             | 1.20 (1.07-1.36)            | 1.15 (0.98-1.34)             | 1.24 (1.08-1.44)             | 1.28 (1.12-1.47)           | 1.32 (1.10-1.58)             | 1.37 (1.16-1.61)             |
| <b>Laboratory findings</b>                                                                |                             |                              |                              |                            |                              |                              |
| Albumin, per 1 g/dL decrease                                                              | 10.43 (5.70-19.08)          | 3.75 (1.91-7.35)             | -                            | 6.17 (3.62-10.52)          | 3.34 (1.70-6.54)             | -                            |
| eGFR, per 10 mL/min decrease                                                              | 1.29 (1.19-1.40)            | 1.18 (1.05-1.32)             | -                            | 1.31 (1.21-1.43)           | 1.29 (1.15-1.46)             | -                            |
| FIB-4                                                                                     |                             |                              |                              |                            |                              |                              |
| <1.45                                                                                     | ref                         | ref                          | -                            | ref                        | ref                          | -                            |
| 1.45-3.25                                                                                 | 3.92 (2.53-6.08)            | 2.96 (1.69-5.17)             | -                            | 6.31 (2.74-14.50)          | 4.59 (1.72-12.22)            | -                            |
| >3.25                                                                                     | 12.37 (6.73-22.72)          | 8.73 (4.11-18.56)            | -                            | 12.43 (5.24-29.50)         | 8.40 (2.90-24.28)            | -                            |
| Hemoglobin, per 1 g/dL decrease                                                           | 1.55 (1.32-1.83)            | 1.16 (0.93-1.43)             | -                            | 1.33 (1.14, 1.54)          | 1.00 (0.81-1.23)             | -                            |
| White blood cell count, per 1 K/ $\mu$ L increase                                         | 1.05 (0.96-1.15)            | 1.24 (1.08-1.43)             | -                            | 1.22 (1.10-1.36)           | 1.49 (1.27-1.73)             | -                            |
| Lymphocyte count, per 1 K/ $\mu$ L decrease                                               | 2.68 (2.00-3.60)            | 2.38 (1.68-3.39)             | -                            | 2.76 (1.87-4.09)           | 2.65 (1.68-4.18)             | -                            |
| VACS Index score <sup>a</sup> , per 5-point increase                                      | 1.48 (1.36-1.61)            | -                            | 1.62 (1.43-1.84)             | 1.45 (1.33-1.58)           | -                            | 1.47 (1.31-1.65)             |

Abbreviations: Covid-19, coronavirus disease 2019; OR, odds ratio; CI, confidence interval; eGFR, estimated glomerular filtration rate, FIB-4, fibrosis 4 score; VACS, Veterans

Aging Cohort Study

<sup>a</sup>The VACS Index score is a validated measure of physiologic injury combining age, aspartate and alanine transaminase, albumin, creatinine, hemoglobin, platelets, white blood cell count, hepatitis C status, and body mass index



**Figure 1.** Distribution of Covid-19 cases in the Veterans Birth Cohort as of March 30, 2020

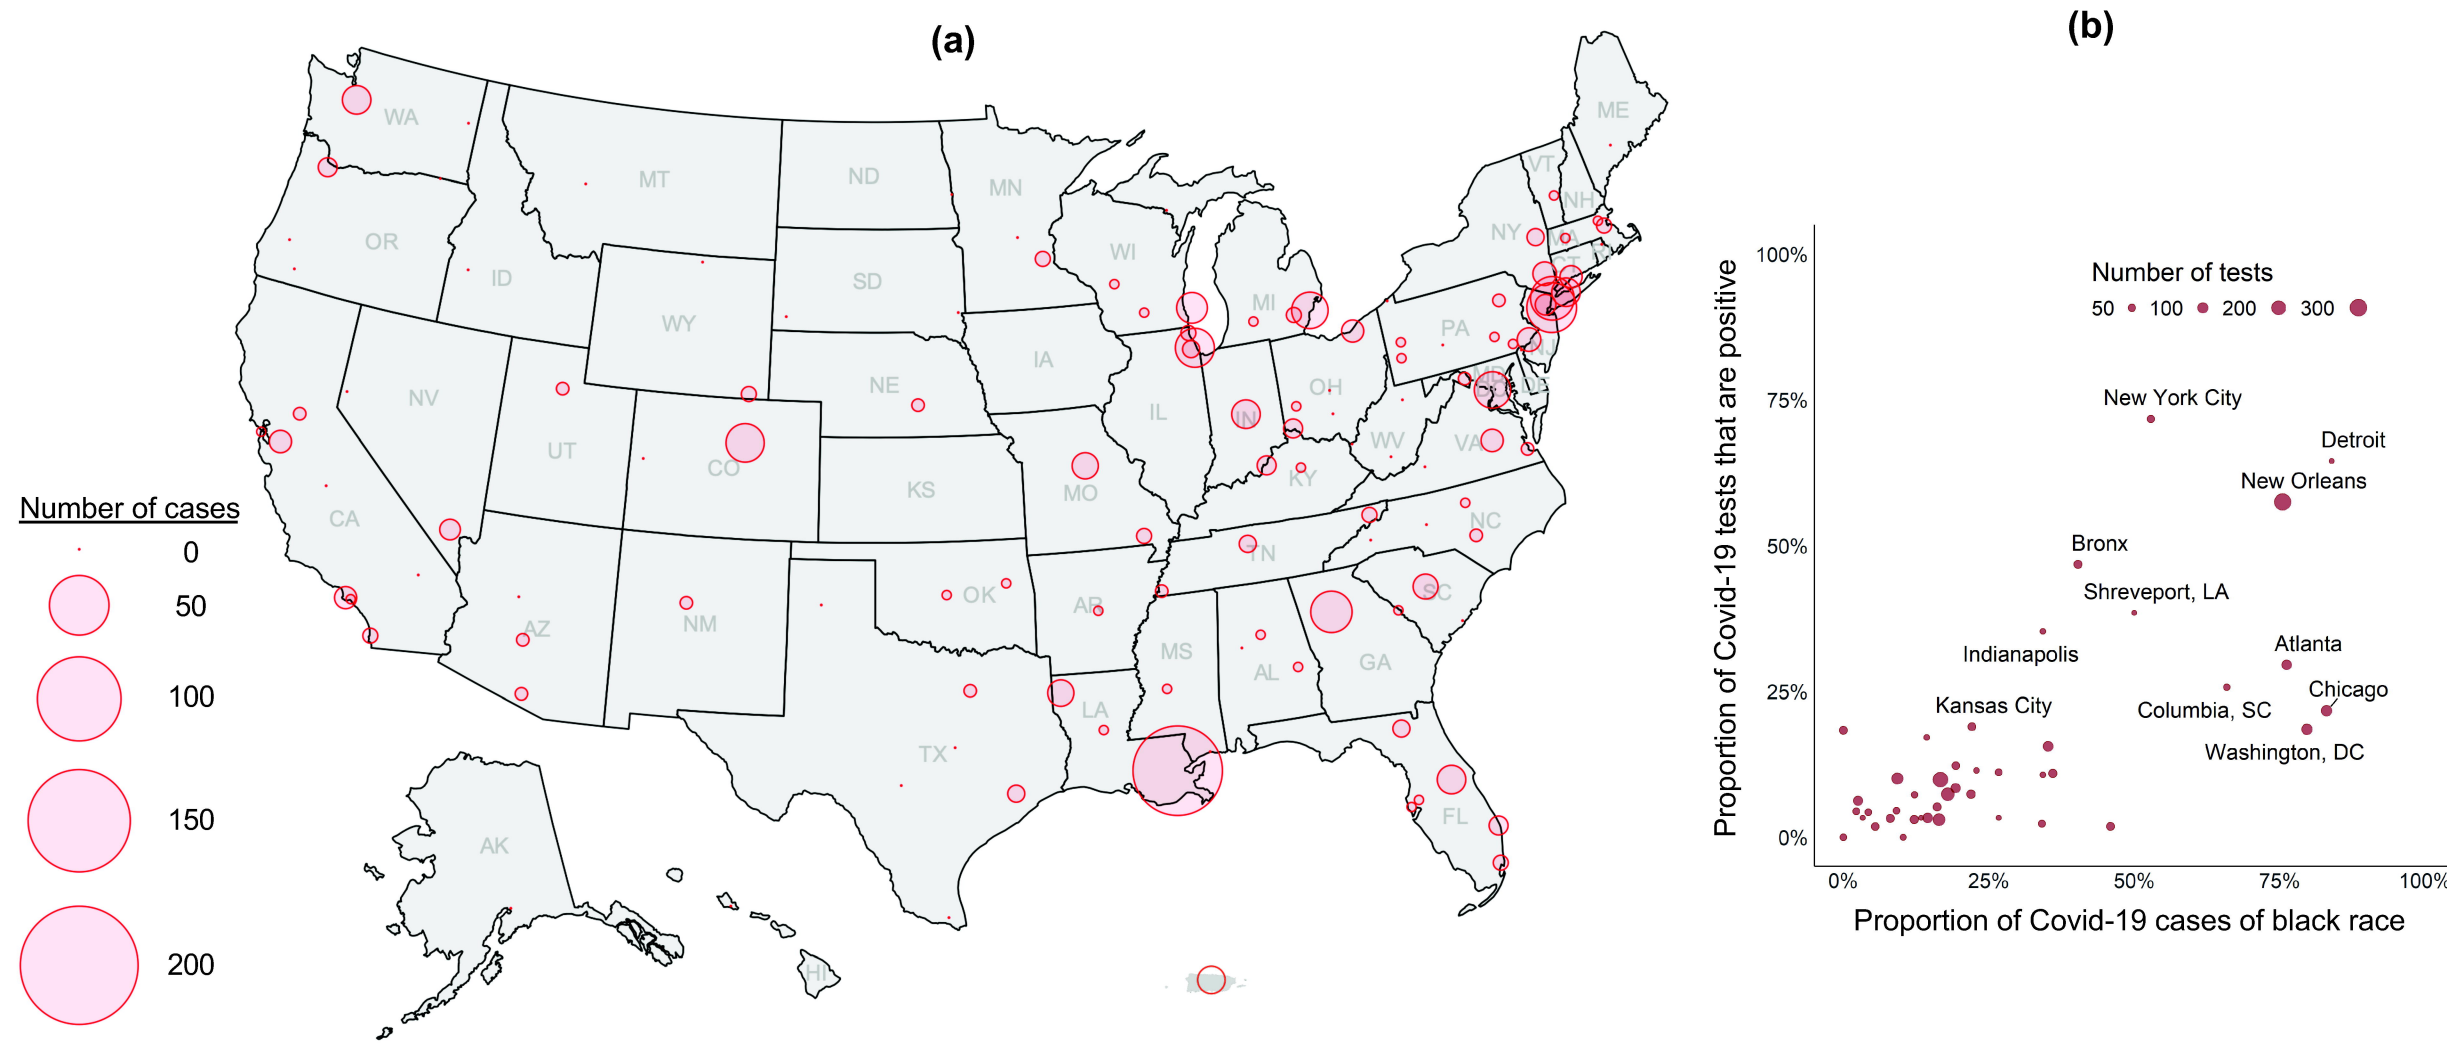

(a) Shown is the distribution of 585/1244 (47%) Covid-19 cases in the Veterans Health Administration captured in the Veterans Birth Cohort as of March 30, 2020 and included in the current study. (b) Shown is the proportion of Covid-19 test results that are positive by the proportion of Covid-19 cases of black race by site of care.
